# Supplementary material
Source: PubMed Central journal article supplement (PMC9252261)
Supplement: NIHMS1817765-supplement-Supplementary_Data.pdf [file NIHMS1817765-supplement-Supplementary_Data.pdf]

## Journal of Hepatology

### CTAT methods

Tables for a “Complete, Transparent, Accurate and Timely account” (CTAT) are now mandatory for all revised submissions. The aim is to enhance the reproducibility of methods.

- Only include the parts relevant to your study
- Refer to the CTAT in the main text as ‘Supplementary CTAT Table’
- Do not add subheadings
- Add as many rows as needed to include all information
- Only include one item per row

#### 1.1 Antibodies

| Name                                       | Citation | Supplier        | Cat no.      | Clone no. |
|--------------------------------------------|----------|-----------------|--------------|-----------|
| Hsc70                                      | [1]      | Stressgen       | SPA-819      |           |
| Hsp27                                      | [2]      | Santa Cruz      | sc-1049      |           |
| Hsp60                                      | [3]      | Enzo            | ADI-SPA-805  |           |
| HSP72                                      | [4]      | Enzo            | ADI-SPA-812  |           |
| Hsp90                                      | [5]      | Cell Signaling  | 4877         | C45G5     |
| JNK1                                       | [6]      | Cell Signaling  | 3708         | (2C6)     |
| JNK2                                       | [7]      | Santa Cruz      | sc-827       | (N-18)    |
| phospho-c-Jun                              | [8]      | Cell Signaling  | 9164 (Ser73) |           |
| phospho-SAPK/JNK                           | [9]      | Cell Signaling  | 9251         |           |
| phospho-SAPK/JNK                           | [10]     | Cell Signalling | 4668         | (81E11)   |
| Rip3                                       | [11]     | ProSci          | 2283         |           |
| $\beta$ -actin                             | [12]     | Sigma-Aldrich   | A1978        |           |
| Goat anti-mouse IgG (H+L), HRP conjugated  | [13]     | Invitrogen      | G21040       |           |
| Goat anti-rabbit IgG (H+L), biotinylated   | [14]     | Vector          | BA-1000      |           |
| Goat anti-rabbit IgG (H+L), HRP conjugated | [15]     | Invitrogen      | G21234       |           |
| Goat anti-rat IgG (H+L), HRP conjugated    | [16]     | Invitrogen      | A10549       |           |

|                            |      |                |        |          |
|----------------------------|------|----------------|--------|----------|
| Rabbit anti-goat IgG (H+L) | [17] | Invitrogen     | R21459 |          |
| Grp78                      | [18] | Cell Signaling | 3177S  | (C50B12) |
| MKK7                       | [19] | Cell Signaling | 4172   |          |
| IREalpha                   | [20] | Cell Signaling | 3294   | 14C10    |
| ASK1 (D11C9)               | [21] | Cell Signaling | 8662   | D11C9    |
| Cytochrome P450E1          |      | Abcam          | 9140   |          |

## 1.2 Organisms

| Name  | Citation                                  | Supplier      | Strain   | Sex            | Age            | Overall n number |
|-------|-------------------------------------------|---------------|----------|----------------|----------------|------------------|
| Mouse | [22]                                      | Charles River | C57BL/6N | Males, females | 2-4 Months old | 30               |
| Mouse | [23]                                      |               | Lap-tTA  | Males, females | 2-4 Months old | 13               |
| Mouse | Generated and characterized in this paper |               | hHsp72   | Male, females  | 2-4 Months old | 43               |

## 1.3 Sequence based reagents

| Name                                                                          | Sequence                                                     | Supplier                                         |
|-------------------------------------------------------------------------------|--------------------------------------------------------------|--------------------------------------------------|
| HspA1A (HSP72) (human)                                                        | F: CTGTACCAGGGTGCCGGTGGT<br>R: GTCCCCAAACTCACCTGAAGTTCT      | Eurofins genomics, Germany                       |
| Lap-tTA (Rat/E.coli)                                                          | F: GCTAGGTGTAGAGCAGCCTACATTG<br>R: GTCCAGATCGAAATCGTCTAGCGCG | Eurofins genomics, Germany                       |
| mCyp1a2 (mouse)<br>Cytochrome P450, family 1, subfamily a, polypeptide 2      | F: TCTGCCAGTCTCCAGCCCCT<br>R: AGATGGCAGTGGCCAGTAGCA          | Biomers, the Serco Industrial Park West, Germany |
| mCyp2e1 (mouse)<br>Cytochrome P450, family 2, subfamily e, polypeptide 1      | F: CTGGCCGAGGGGACATTCCTGT<br>R: AGGGAAAACCTCCGCACGTCCT       | Biomers, the Serco Industrial Park West, Germany |
| mCyp3a11 (mouse)<br>Cytochrome P450, family 3, subfamily a, polypeptide 11    | F: TGCTGTCACAGACCCAGAGACG<br>R: ACTCATTATCCCCACTGGGCCA       | Biomers, the Serco Industrial Park West, Germany |
| (m+h) HSP72<br>(mouse+human)<br>Heat shock protein family A (Hsp70) member 1A | F: ACGGGCGCGACCTGAACAAG<br>R: ATCAGGATGGCCGCCTGCAC           | Biomers, the Serco Industrial Park West, Germany |

|                                                                           |                                                            |                               |
|---------------------------------------------------------------------------|------------------------------------------------------------|-------------------------------|
| hHSP72 (human)<br><i>Heat shock protein family A (Hsp70) member 1A</i>    | F: GCCAACAAGATCACCATCAC<br>R: TTTGTA CTCTCCGCCTCCT         | Eurofins genomics,<br>Germany |
| mIL6 (mouse)<br><i>Interleukin 6</i>                                      | F: ACAAGCCAGAGTCCTTCAGAGAGA<br>R: TGGTCTTGGTCCTTAGCCACTCC  | Eurofins genomics,<br>Germany |
| mHamp1 (mouse)<br><i>Hepcidin</i>                                         | F: CTGTCTCCTGCTTCTCCTCCT<br>R: GGCTGCAGCTCTGTAGTCTGT       | Eurofins genomics,<br>Germany |
| mSod2 (mouse)<br><i>Manganese superoxide dismutase 2</i>                  | F: GAACAATCTCAACGCCACCG<br>R: GCTGAAGAGCGACCTGAGTT         | Eurofins genomics,<br>Germany |
| hRPLPO (human)<br><i>Large Ribosomal Protein</i>                          | F: GCAATGTTGCCAGTGTCTGT<br>R: GCCTTGACCTTTTCAGCAAG         | Eurofins genomics,<br>Germany |
| mL7 (mouse)<br><i>Ribosomal protein L7</i>                                | F: GAAAGGCAAGGAGGAAGCTCATCT<br>R: AATCTCAGTGCGGTACATCTGCCT | Eurofins genomics,<br>Germany |
| Hsp27 (Hspb2) (mouse)<br><i>Hspb2 heat shock protein 2</i>                | F: TGTCTACCTCCCGTGGTGAT<br>R: GGTTTATTCAGCCCCACCC          | Eurofins genomics,<br>Germany |
| GRP78-Hspa5 (mouse)<br>HSPA5 heat shock protein family A (Hsp70) member 5 | F: GGTACCCACCAAGAAGTCTCAG<br>R: TCAGCAA CTCTCAGCATCAT      | Eurofins genomics,<br>Germany |
| Grp78 (human)<br>HSPA5 heat shock protein family A (Hsp70) member 5       | F: GCTTATGGCCTGGATAAGAGG<br>R: CACGCTGGTCAAAGTCTTCTC       | Eurofins genomics,<br>Germany |
| Hsp27 (Hspb2) (human)<br><i>Hspb2 heat shock protein 2</i>                | F: AGACGAGGTGACTGTGAGGA<br>R: ACATAGGTGCGGCAGA ACTC        | Eurofins genomics,<br>Germany |
| CD68 (human)                                                              | F: AGCTACATGGCGGTGGAGTA<br>R: CGAAGGGATGCATTCTGAGC         | Eurofins genomics,<br>Germany |
| IL1b (human)<br><i>Interleukin 1beta</i>                                  | F: GCTCGCCAGTGAAATGATGG<br>R: GGTGGTTCGGAGATTCGTAGC        | Eurofins genomics,<br>Germany |
| IL6 (human)<br><i>Interleukin 6</i>                                       | F: TAGTGAGGAACAAGCCAGAGC<br>R: TGGGTCAGGGGTGGTTATTG        | Eurofins genomics,<br>Germany |

#### 1.4 Biological samples

| Description          | Source                                            | Identifier                                                                                       |
|----------------------|---------------------------------------------------|--------------------------------------------------------------------------------------------------|
| Human liver biopsies | University Hospitals Ulm, Aachen, Munich and Graz | Liver specimen from healthy subjects, patients with NASH and chronic hepatitis C infection (HCV) |

#### 1.5 Software

| Software name         | Manufacturer | Version       |
|-----------------------|--------------|---------------|
| Adobe Photoshop CS2   | Adobe        | Version CS2   |
| Adobe Illustrator CS2 | Adobe        | Version CS2   |
| Living Image®         | Caliper      | Version 4.3.1 |

|                                 |                          |               |
|---------------------------------|--------------------------|---------------|
| Excel, Word, Powerpoint         | Microsoft                | Version 2010  |
| KC4                             | BioTek Instruments, Inc. |               |
| Axio Vision                     | Zeiss                    | Rel.4.8       |
| 7300 Sequenz-Detektion-Software | Applied Biosystems       | SDS v1.4.1    |
| ImageQuant LAS 400              | GE Healthcare            |               |
| i-control                       | Tecan                    |               |
| GraphPad Prism 5                | GraphPad                 | Version 5     |
| Endnote X7.1                    | Thomson Reuters          | Version X7.1  |
| Image J                         | Wayne Rasband            |               |
| Primer3 Input                   |                          | Version 0.4.0 |

### 1.6 Other (e.g. drugs, proteins, vectors etc.)

| Name of the product                           | Company               | Catalog number               |
|-----------------------------------------------|-----------------------|------------------------------|
| human Hsp72 construct pcDNA5/FRT/TO V5 HSPA1A | Addgene               | Plasmid 19456                |
| pBI-L Tet Vector                              | Clontech Laboratories | GenBank AccessionNo.:U89934. |
| Paracetamol Powder                            | Fagron                | 100168-0001                  |
| Palmitic acid                                 | Sigma                 | P0500-10G                    |

Scientific reports 2016-2-19

### References:

1. Leu J-J, Pimkina J, Pandey P, et al. HSP70 inhibition by the small-molecule 2-phenylethanesulfonamide impairs protein clearance pathways in tumor cells. *Molecular Cancer Research* 2011;**9**(7):936-47
2. Huang C-Y, Kuo W-W, Lo J-F, et al. Doxorubicin attenuates CHIP-guarded HSF1 nuclear translocation and protein stability to trigger IGF-IIR-dependent cardiomyocyte death. *Cell death & disease* 2016;**7**(11):e2455
3. Guldiken N, Kobazi Ensari G, Lahiri P, et al. Keratin 23 is a stress-inducible marker of mouse and human ductular reaction in liver disease. *Journal of hepatology* 2016;**65**(3):552-9 doi: 10.1016/j.jhep.2016.04.024[published Online First: Epub Date]].
4. Shibaguchi T, Yamaguchi Y, Miyaji N, et al. Astaxanthin intake attenuates muscle atrophy caused by immobilization in rats. *Physiological reports* 2016;**4**(15):e12885
5. Olivares O, Mayers JR, Gouirand V, et al. Collagen-derived proline promotes pancreatic ductal adenocarcinoma cell survival under nutrient limited conditions. *Nature communications* 2017;**8**:ncomms16031
6. Yosef R, Pilpel N, Papismadov N, et al. p21 maintains senescent cell viability under persistent DNA damage response by restraining JNK and caspase signaling. *The EMBO Journal* 2017:e201695553
7. Yoon C, Cho S-J, Aksoy BA, et al. Chemotherapy resistance in diffuse-type gastric adenocarcinoma is mediated by RhoA activation in cancer stem-like cells. *Clinical cancer research* 2015
8. Long M, Zhan M, Xu S, et al. miR-92b-3p acts as a tumor suppressor by targeting Gabra3 in pancreatic cancer. *Molecular cancer* 2017;**16**(1):167

9. Sun L, Huang T, Xu W, et al. Advanced glycation end products promote VEGF expression and thus choroidal neovascularization via Cyr61-PI3K/AKT signaling pathway. *Scientific reports* 2017;**7**(1):14925 doi: 10.1038/s41598-017-14015-6[published Online First: Epub Date]].
10. Li H-L, Lu L, Wang X-S, et al. Alteration of gut microbiota and inflammatory cytokine/chemokine profiles in 5-fluorouracil induced intestinal mucositis. *Frontiers in cellular and infection microbiology* 2017;**7**
11. Yang C, Li J, Yu L, et al. Regulation of RIP3 by the transcription factor Sp1 and the epigenetic regulator UHRF1 modulates cancer cell necroptosis. *Cell Death & Disease* 2017;**8**(10):e3084
12. Chung VY, Tan TZ, Tan M, et al. GRHL2-miR-200-ZEB1 maintains the epithelial status of ovarian cancer through transcriptional regulation and histone modification. *Scientific reports* 2016;**6**:19943
13. Tasaki J, Uchiyama-Tasaki C, Rouhana L. Analysis of stem cell motility in vivo based on immunodetection of planarian neoblasts and tracing of BrdU-labeled cells after partial irradiation. *Cytoskeleton Methods and Protocols: Methods and Protocols* 2016:323-38
14. Secchi MF, Crescenzi M, Masola V, et al. Heparanase and macrophage interplay in the onset of liver fibrosis. *Scientific reports* 2017;**7**(1):14956
15. Sandau US, Colino-Oliveira M, Jones A. Adenosine Kinase Deficiency in the Brain Results in Maladaptive Synaptic Plasticity. 2016;**36**(48):12117-28
16. Ge Y, Zhang L, Nikolova M, et al. Strand-specific in vivo screen of cancer-associated miRNAs unveils a role for miR-21 [lowast] in SCC progression. *Nature cell biology* 2016;**18**(1):111-21
17. Bobis-Wozowicz S, Kmiolek K, Kania K, et al. Diverse impact of xeno-free conditions on biological and regenerative properties of hUC-MSCs and their extracellular vesicles. *Journal of Molecular Medicine* 2017;**95**(2):205-20
18. Bedau T, Schumacher N, Peters F, et al. Cancer-associated mutations in the canonical cleavage site do not influence CD99 shedding by the metalloprotease meprin  $\beta$  but alter cell migration in vitro. *Oncotarget* 2017;**8**(33):54873
19. Hu S, Dong X, Gao W, et al. Alternative promotion and suppression of metastasis by JNK2 governed by its phosphorylation. *Oncotarget* 2017;**8**(34):56569-81 doi: 10.18632/oncotarget.17507[published Online First: Epub Date]].
20. Pintado C, Macias S, Dominguez-Martin H, et al. Neuroinflammation alters cellular proteostasis by producing endoplasmic reticulum stress, autophagy activation and disrupting ERAD activation. *Scientific reports* 2017;**7**(1):8100 doi: 10.1038/s41598-017-08722-3[published Online First: Epub Date]].
21. Ishaq M, Kumar S, Varinli H, et al. Atmospheric gas plasma-induced ROS production activates TNF-ASK1 pathway for the induction of melanoma cancer cell apoptosis. *Molecular biology of the cell* 2014;**25**(9):1523-31 doi: 10.1091/mbc.E13-10-0590[published Online First: Epub Date]].
22. Waterston RH, Lindblad-Toh K, Birney E, et al. Initial sequencing and comparative analysis of the mouse genome. *Nature* 2002;**420**(6915):520-62 doi: 10.1038/nature01262[published Online First: Epub Date]].
23. Sunami Y, Leithäuser F, Gul S, et al. Hepatic activation of IKK/NF $\kappa$ B signaling induces liver fibrosis via macrophage-mediated chronic inflammation. *Hepatology (Baltimore, Md)* 2012;**56**(3):1117-28

## ICMJE Form for Disclosure of Potential Conflicts of Interest

### Instructions

The purpose of this form is to provide readers of your manuscript with information about your other interests that could influence how they receive and understand your work. The form is designed to be completed electronically and stored electronically. It contains programming that allows appropriate data display. Each author should submit a separate form and is responsible for the accuracy and completeness of the submitted information. The form is in six parts.

#### 1. Identifying information.

#### 2. The work under consideration for publication.

This section asks for information about the work that you have submitted for publication. The time frame for this reporting is that of the work itself, from the initial conception and planning to the present. The requested information is about resources that you received, either directly or indirectly (via your institution), to enable you to complete the work. Checking "No" means that you did the work without receiving any financial support from any third party -- that is, the work was supported by funds from the same institution that pays your salary and that institution did not receive third-party funds with which to pay you. If you or your institution received funds from a third party to support the work, such as a government granting agency, charitable foundation or commercial sponsor, check "Yes".

#### 3. Relevant financial activities outside the submitted work.

This section asks about your financial relationships with entities in the bio-medical arena that could be perceived to influence, or that give the appearance of potentially influencing, what you wrote in the submitted work. You should disclose interactions with ANY entity that could be considered broadly relevant to the work. For example, if your article is about testing an epidermal growth factor receptor (EGFR) antagonist in lung cancer, you should report all associations with entities pursuing diagnostic or therapeutic strategies in cancer in general, not just in the area of EGFR or lung cancer.

Report all sources of revenue paid (or promised to be paid) directly to you or your institution on your behalf over the 36 months prior to submission of the work. This should include all monies from sources with relevance to the submitted work, not just monies from the entity that sponsored the research. Please note that your interactions with the work's sponsor that are outside the submitted work should also be listed here. If there is any question, it is usually better to disclose a relationship than not to do so.

For grants you have received for work outside the submitted work, you should disclose support ONLY from entities that could be perceived to be affected financially by the published work, such as drug companies, or foundations supported by entities that could be perceived to have a financial stake in the outcome. Public funding sources, such as government agencies, charitable foundations or academic institutions, need not be disclosed. For example, if a government agency sponsored a study in which you have been involved and drugs were provided by a pharmaceutical company, you need only list the pharmaceutical company.

#### 4. Intellectual Property.

This section asks about patents and copyrights, whether pending, issued, licensed and/or receiving royalties.

#### 5. Relationships not covered above.

Use this section to report other relationships or activities that readers could perceive to have influenced, or that give the appearance of potentially influencing, what you wrote in the submitted work.

#### Definitions.

**Entity:** government agency, foundation, commercial sponsor, academic institution, etc.

**Grant:** A grant from an entity, generally [but not always] paid to your organization

**Personal Fees:** Monies paid to you for services rendered, generally honoraria, royalties, or fees for consulting, lectures, speakers bureaus, expert testimony, employment, or other affiliations

**Non-Financial Support:** Examples include drugs/equipment supplied by the entity, travel paid by the entity, writing assistance, administrative support, etc.

**Other:** Anything not covered under the previous three boxes

**Pending:** The patent has been filed but not issued

**Issued:** The patent has been issued by the agency

**Licensed:** The patent has been licensed to an entity, whether earning royalties or not

**Royalties:** Funds are coming in to you or your institution due to your patent

## ICMJE Form for Disclosure of Potential Conflicts of Interest

### Section 1. Identifying Information

1. Given Name (First Name)

Alexandra K.

2. Surname (Last Name)

Kiemer

3. Date

14-December-2017

4. Are you the corresponding author?

 Yes No

Corresponding Author's Name

5. Manuscript Title

Hsp72 protects from liver injury via attenuation of hepatocellular death, oxidative stress and JNK-signaling

6. Manuscript Identifying Number (if you know it)

JHEPAT-D-17-00645

### Section 2. The Work Under Consideration for Publication

Did you or your institution **at any time** receive payment or services from a third party (government, commercial, private foundation, etc.) for any aspect of the submitted work (including but not limited to grants, data monitoring board, study design, manuscript preparation, statistical analysis, etc.)?

Are there any relevant conflicts of interest?

 Yes No

### Section 3. Relevant financial activities outside the submitted work.

Place a check in the appropriate boxes in the table to indicate whether you have financial relationships (regardless of amount of compensation) with entities as described in the instructions. Use one line for each entity; add as many lines as you need by clicking the "Add +" box. You should report relationships that were **present during the 36 months prior to publication**.

Are there any relevant conflicts of interest?

 Yes No

### Section 4. Intellectual Property -- Patents & Copyrights

Do you have any patents, whether planned, pending or issued, broadly relevant to the work?

 Yes No

## ICMJE Form for Disclosure of Potential Conflicts of Interest

---

### Section 5. Relationships not covered above

Are there other relationships or activities that readers could perceive to have influenced, or that give the appearance of potentially influencing, what you wrote in the submitted work?

- Yes, the following relationships/conditions/circumstances are present (explain below):
- No other relationships/conditions/circumstances that present a potential conflict of interest

At the time of manuscript acceptance, journals will ask authors to confirm and, if necessary, update their disclosure statements. On occasion, journals may ask authors to disclose further information about reported relationships.

### Section 6. Disclosure Statement

Based on the above disclosures, this form will automatically generate a disclosure statement, which will appear in the box below.

Dr. Kiemer has nothing to disclose.

### Evaluation and Feedback

Please visit <http://www.icmje.org/cgi-bin/feedback> to provide feedback on your experience with completing this form.



## ICMJE Form for Disclosure of Potential Conflicts of Interest

### Instructions

The purpose of this form is to provide readers of your manuscript with information about your other interests that could influence how they receive and understand your work. The form is designed to be completed electronically and stored electronically. It contains programming that allows appropriate data display. Each author should submit a separate form and is responsible for the accuracy and completeness of the submitted information. The form is in six parts.

#### 1. Identifying information.

#### 2. The work under consideration for publication.

This section asks for information about the work that you have submitted for publication. The time frame for this reporting is that of the work itself, from the initial conception and planning to the present. The requested information is about resources that you received, either directly or indirectly (via your institution), to enable you to complete the work. Checking "No" means that you did the work without receiving any financial support from any third party -- that is, the work was supported by funds from the same institution that pays your salary and that institution did not receive third-party funds with which to pay you. If you or your institution received funds from a third party to support the work, such as a government granting agency, charitable foundation or commercial sponsor, check "Yes".

#### 3. Relevant financial activities outside the submitted work.

This section asks about your financial relationships with entities in the bio-medical arena that could be perceived to influence, or that give the appearance of potentially influencing, what you wrote in the submitted work. You should disclose interactions with ANY entity that could be considered broadly relevant to the work. For example, if your article is about testing an epidermal growth factor receptor (EGFR) antagonist in lung cancer, you should report all associations with entities pursuing diagnostic or therapeutic strategies in cancer in general, not just in the area of EGFR or lung cancer.

Report all sources of revenue paid (or promised to be paid) directly to you or your institution on your behalf over the 36 months prior to submission of the work. This should include all monies from sources with relevance to the submitted work, not just monies from the entity that sponsored the research. Please note that your interactions with the work's sponsor that are outside the submitted work should also be listed here. If there is any question, it is usually better to disclose a relationship than not to do so.

For grants you have received for work outside the submitted work, you should disclose support ONLY from entities that could be perceived to be affected financially by the published work, such as drug companies, or foundations supported by entities that could be perceived to have a financial stake in the outcome. Public funding sources, such as government agencies, charitable foundations or academic institutions, need not be disclosed. For example, if a government agency sponsored a study in which you have been involved and drugs were provided by a pharmaceutical company, you need only list the pharmaceutical company.

#### 4. Intellectual Property.

This section asks about patents and copyrights, whether pending, issued, licensed and/or receiving royalties.

#### 5. Relationships not covered above.

Use this section to report other relationships or activities that readers could perceive to have influenced, or that give the appearance of potentially influencing, what you wrote in the submitted work.

#### Definitions.

**Entity:** government agency, foundation, commercial sponsor, academic institution, etc.

**Grant:** A grant from an entity, generally [but not always] paid to your organization

**Personal Fees:** Monies paid to you for services rendered, generally honoraria, royalties, or fees for consulting, lectures, speakers bureaus, expert testimony, employment, or other affiliations

**Non-Financial Support:** Examples include drugs/equipment supplied by the entity, travel paid by the entity, writing assistance, administrative support, etc.

**Other:** Anything not covered under the previous three boxes

**Pending:** The patent has been filed but not issued

**Issued:** The patent has been issued by the agency

**Licensed:** The patent has been licensed to an entity, whether earning royalties or not

**Royalties:** Funds are coming in to you or your institution due to your patent

## ICMJE Form for Disclosure of Potential Conflicts of Interest

### Section 1. Identifying Information

|                                                                                                                                     |                                                                     |                                             |
|-------------------------------------------------------------------------------------------------------------------------------------|---------------------------------------------------------------------|---------------------------------------------|
| 1. Given Name (First Name)<br>Giovanna                                                                                              | 2. Surname (Last Name)<br>Vella                                     | 3. Date<br>15-December-2017                 |
| 4. Are you the corresponding author?                                                                                                | <input type="checkbox"/> Yes <input checked="" type="checkbox"/> No | Corresponding Author's Name<br>Pavel Strnad |
| 5. Manuscript Title<br>Hsp72 protects from liver injury via attenuation of hepatocellular death, oxidative stress and JNK-signaling |                                                                     |                                             |
| 6. Manuscript Identifying Number (if you know it)<br>_____                                                                          |                                                                     |                                             |

### Section 2. The Work Under Consideration for Publication

Did you or your institution **at any time** receive payment or services from a third party (government, commercial, private foundation, etc.) for any aspect of the submitted work (including but not limited to grants, data monitoring board, study design, manuscript preparation, statistical analysis, etc.)?

Are there any relevant conflicts of interest?  Yes  No

### Section 3. Relevant financial activities outside the submitted work.

Place a check in the appropriate boxes in the table to indicate whether you have financial relationships (regardless of amount of compensation) with entities as described in the instructions. Use one line for each entity; add as many lines as you need by clicking the "Add +" box. You should report relationships that were **present during the 36 months prior to publication**.

Are there any relevant conflicts of interest?  Yes  No

### Section 4. Intellectual Property -- Patents & Copyrights

Do you have any patents, whether planned, pending or issued, broadly relevant to the work?  Yes  No

## ICMJE Form for Disclosure of Potential Conflicts of Interest

---

### Section 5. Relationships not covered above

Are there other relationships or activities that readers could perceive to have influenced, or that give the appearance of potentially influencing, what you wrote in the submitted work?

- Yes, the following relationships/conditions/circumstances are present (explain below):
- No other relationships/conditions/circumstances that present a potential conflict of interest

At the time of manuscript acceptance, journals will ask authors to confirm and, if necessary, update their disclosure statements. On occasion, journals may ask authors to disclose further information about reported relationships.

### Section 6. Disclosure Statement

Based on the above disclosures, this form will automatically generate a disclosure statement, which will appear in the box below.

Dr. Vella has nothing to disclose.

### Evaluation and Feedback

Please visit <http://www.icmje.org/cgi-bin/feedback> to provide feedback on your experience with completing this form.

## ICMJE Form for Disclosure of Potential Conflicts of Interest

### Instructions

The purpose of this form is to provide readers of your manuscript with information about your other interests that could influence how they receive and understand your work. The form is designed to be completed electronically and stored electronically. It contains programming that allows appropriate data display. Each author should submit a separate form and is responsible for the accuracy and completeness of the submitted information. The form is in six parts.

#### 1. Identifying information.

#### 2. The work under consideration for publication.

This section asks for information about the work that you have submitted for publication. The time frame for this reporting is that of the work itself, from the initial conception and planning to the present. The requested information is about resources that you received, either directly or indirectly (via your institution), to enable you to complete the work. Checking "No" means that you did the work without receiving any financial support from any third party -- that is, the work was supported by funds from the same institution that pays your salary and that institution did not receive third-party funds with which to pay you. If you or your institution received funds from a third party to support the work, such as a government granting agency, charitable foundation or commercial sponsor, check "Yes".

#### 3. Relevant financial activities outside the submitted work.

This section asks about your financial relationships with entities in the bio-medical arena that could be perceived to influence, or that give the appearance of potentially influencing, what you wrote in the submitted work. You should disclose interactions with ANY entity that could be considered broadly relevant to the work. For example, if your article is about testing an epidermal growth factor receptor (EGFR) antagonist in lung cancer, you should report all associations with entities pursuing diagnostic or therapeutic strategies in cancer in general, not just in the area of EGFR or lung cancer.

Report all sources of revenue paid (or promised to be paid) directly to you or your institution on your behalf over the 36 months prior to submission of the work. This should include all monies from sources with relevance to the submitted work, not just monies from the entity that sponsored the research. Please note that your interactions with the work's sponsor that are outside the submitted work should also be listed here. If there is any question, it is usually better to disclose a relationship than not to do so.

For grants you have received for work outside the submitted work, you should disclose support ONLY from entities that could be perceived to be affected financially by the published work, such as drug companies, or foundations supported by entities that could be perceived to have a financial stake in the outcome. Public funding sources, such as government agencies, charitable foundations or academic institutions, need not be disclosed. For example, if a government agency sponsored a study in which you have been involved and drugs were provided by a pharmaceutical company, you need only list the pharmaceutical company.

#### 4. Intellectual Property.

This section asks about patents and copyrights, whether pending, issued, licensed and/or receiving royalties.

#### 5. Relationships not covered above.

Use this section to report other relationships or activities that readers could perceive to have influenced, or that give the appearance of potentially influencing, what you wrote in the submitted work.

#### Definitions.

**Entity:** government agency, foundation, commercial sponsor, academic institution, etc.

**Grant:** A grant from an entity, generally [but not always] paid to your organization

**Personal Fees:** Monies paid to you for services rendered, generally honoraria, royalties, or fees for consulting, lectures, speakers bureaus, expert testimony, employment, or other affiliations

**Non-Financial Support:** Examples include drugs/equipment supplied by the entity, travel paid by the entity, writing assistance, administrative support, etc.

**Other:** Anything not covered under the previous three boxes

**Pending:** The patent has been filed but not issued

**Issued:** The patent has been issued by the agency

**Licensed:** The patent has been licensed to an entity, whether earning royalties or not

**Royalties:** Funds are coming in to you or your institution due to your patent

## ICMJE Form for Disclosure of Potential Conflicts of Interest

### Section 1. Identifying Information

|                                                                                                                                     |                                 |                             |
|-------------------------------------------------------------------------------------------------------------------------------------|---------------------------------|-----------------------------|
| 1. Given Name (First Name)<br>Laura                                                                                                 | 2. Surname (Last Name)<br>James | 3. Date<br>13-December-2017 |
| 4. Are you the corresponding author? <input checked="" type="checkbox"/> Yes <input type="checkbox"/> No                            |                                 |                             |
| 5. Manuscript Title<br>Hsp72 protects from liver injury via attenuation of hepatocellular death, oxidative stress and JNK-signaling |                                 |                             |
| 6. Manuscript Identifying Number (if you know it)<br>_____                                                                          |                                 |                             |

### Section 2. The Work Under Consideration for Publication

Did you or your institution **at any time** receive payment or services from a third party (government, commercial, private foundation, etc.) for any aspect of the submitted work (including but not limited to grants, data monitoring board, study design, manuscript preparation, statistical analysis, etc.)?

Are there any relevant conflicts of interest?  Yes  No

### Section 3. Relevant financial activities outside the submitted work.

Place a check in the appropriate boxes in the table to indicate whether you have financial relationships (regardless of amount of compensation) with entities as described in the instructions. Use one line for each entity; add as many lines as you need by clicking the "Add +" box. You should report relationships that were **present during the 36 months prior to publication**.

Are there any relevant conflicts of interest?  Yes  No

If yes, please fill out the appropriate information below.

| Name of Entity                                                            | Grant?                              | Personal Fees?           | Non-Financial Support?   | Other?                   | Comments                      |
|---------------------------------------------------------------------------|-------------------------------------|--------------------------|--------------------------|--------------------------|-------------------------------|
| STTR grant to develop a point of care test of acetaminophen liver injury. | <input checked="" type="checkbox"/> | <input type="checkbox"/> | <input type="checkbox"/> | <input type="checkbox"/> | Covers a portion of my salary |

### Section 4. Intellectual Property -- Patents & Copyrights

Do you have any patents, whether planned, pending or issued, broadly relevant to the work?  Yes  No

## ICMJE Form for Disclosure of Potential Conflicts of Interest

---

### Section 5. Relationships not covered above

Are there other relationships or activities that readers could perceive to have influenced, or that give the appearance of potentially influencing, what you wrote in the submitted work?

- Yes, the following relationships/conditions/circumstances are present (explain below):
- No other relationships/conditions/circumstances that present a potential conflict of interest

At the time of manuscript acceptance, journals will ask authors to confirm and, if necessary, update their disclosure statements. On occasion, journals may ask authors to disclose further information about reported relationships.

### Section 6. Disclosure Statement

Based on the above disclosures, this form will automatically generate a disclosure statement, which will appear in the box below.

R42DK079387 awarded to Dr. James to develop a rapid assay for detection of acetaminophen protein adducts in human blood samples.

### Evaluation and Feedback

Please visit <http://www.icmje.org/cgi-bin/feedback> to provide feedback on your experience with completing this form.

## ICMJE Form for Disclosure of Potential Conflicts of Interest

### Instructions

The purpose of this form is to provide readers of your manuscript with information about your other interests that could influence how they receive and understand your work. The form is designed to be completed electronically and stored electronically. It contains programming that allows appropriate data display. Each author should submit a separate form and is responsible for the accuracy and completeness of the submitted information. The form is in six parts.

#### 1. Identifying information.

#### 2. The work under consideration for publication.

This section asks for information about the work that you have submitted for publication. The time frame for this reporting is that of the work itself, from the initial conception and planning to the present. The requested information is about resources that you received, either directly or indirectly (via your institution), to enable you to complete the work. Checking "No" means that you did the work without receiving any financial support from any third party -- that is, the work was supported by funds from the same institution that pays your salary and that institution did not receive third-party funds with which to pay you. If you or your institution received funds from a third party to support the work, such as a government granting agency, charitable foundation or commercial sponsor, check "Yes".

#### 3. Relevant financial activities outside the submitted work.

This section asks about your financial relationships with entities in the bio-medical arena that could be perceived to influence, or that give the appearance of potentially influencing, what you wrote in the submitted work. You should disclose interactions with ANY entity that could be considered broadly relevant to the work. For example, if your article is about testing an epidermal growth factor receptor (EGFR) antagonist in lung cancer, you should report all associations with entities pursuing diagnostic or therapeutic strategies in cancer in general, not just in the area of EGFR or lung cancer.

Report all sources of revenue paid (or promised to be paid) directly to you or your institution on your behalf over the 36 months prior to submission of the work. This should include all monies from sources with relevance to the submitted work, not just monies from the entity that sponsored the research. Please note that your interactions with the work's sponsor that are outside the submitted work should also be listed here. If there is any question, it is usually better to disclose a relationship than not to do so.

For grants you have received for work outside the submitted work, you should disclose support ONLY from entities that could be perceived to be affected financially by the published work, such as drug companies, or foundations supported by entities that could be perceived to have a financial stake in the outcome. Public funding sources, such as government agencies, charitable foundations or academic institutions, need not be disclosed. For example, if a government agency sponsored a study in which you have been involved and drugs were provided by a pharmaceutical company, you need only list the pharmaceutical company.

#### 4. Intellectual Property.

This section asks about patents and copyrights, whether pending, issued, licensed and/or receiving royalties.

#### 5. Relationships not covered above.

Use this section to report other relationships or activities that readers could perceive to have influenced, or that give the appearance of potentially influencing, what you wrote in the submitted work.

#### Definitions.

**Entity:** government agency, foundation, commercial sponsor, academic institution, etc.

**Grant:** A grant from an entity, generally [but not always] paid to your organization

**Personal Fees:** Monies paid to you for services rendered, generally honoraria, royalties, or fees for consulting, lectures, speakers bureaus, expert testimony, employment, or other affiliations

**Non-Financial Support:** Examples include drugs/equipment supplied by the entity, travel paid by the entity, writing assistance, administrative support, etc.

**Other:** Anything not covered under the previous three boxes

**Pending:** The patent has been filed but not issued

**Issued:** The patent has been issued by the agency

**Licensed:** The patent has been licensed to an entity, whether earning royalties or not

**Royalties:** Funds are coming in to you or your institution due to your patent

## ICMJE Form for Disclosure of Potential Conflicts of Interest

### Section 1. Identifying Information

1. Given Name (First Name)

Sonja

2. Surname (Last Name)

Kessler

3. Date

15-December-2017

4. Are you the corresponding author?

Yes

No

Corresponding Author's Name

Kateryna Levada

5. Manuscript Title

Hsp72 protects from liver injury via attenuation of hepatocellular death, oxidative stress and JNK-signaling

6. Manuscript Identifying Number (if you know it)

### Section 2. The Work Under Consideration for Publication

Did you or your institution **at any time** receive payment or services from a third party (government, commercial, private foundation, etc.) for any aspect of the submitted work (including but not limited to grants, data monitoring board, study design, manuscript preparation, statistical analysis, etc.)?

Are there any relevant conflicts of interest?

Yes

No

### Section 3. Relevant financial activities outside the submitted work.

Place a check in the appropriate boxes in the table to indicate whether you have financial relationships (regardless of amount of compensation) with entities as described in the instructions. Use one line for each entity; add as many lines as you need by clicking the "Add +" box. You should report relationships that were **present during the 36 months prior to publication**.

Are there any relevant conflicts of interest?

Yes

No

### Section 4. Intellectual Property -- Patents & Copyrights

Do you have any patents, whether planned, pending or issued, broadly relevant to the work?

Yes

No



## ICMJE Form for Disclosure of Potential Conflicts of Interest

---

### Section 5. Relationships not covered above

Are there other relationships or activities that readers could perceive to have influenced, or that give the appearance of potentially influencing, what you wrote in the submitted work?

- Yes, the following relationships/conditions/circumstances are present (explain below):
- No other relationships/conditions/circumstances that present a potential conflict of interest

At the time of manuscript acceptance, journals will ask authors to confirm and, if necessary, update their disclosure statements. On occasion, journals may ask authors to disclose further information about reported relationships.

### Section 6. Disclosure Statement

Based on the above disclosures, this form will automatically generate a disclosure statement, which will appear in the box below.

Dr. Kessler has nothing to disclose.

### Evaluation and Feedback

Please visit <http://www.icmje.org/cgi-bin/feedback> to provide feedback on your experience with completing this form.

## ICMJE Form for Disclosure of Potential Conflicts of Interest

### Instructions

The purpose of this form is to provide readers of your manuscript with information about your other interests that could influence how they receive and understand your work. The form is designed to be completed electronically and stored electronically. It contains programming that allows appropriate data display. Each author should submit a separate form and is responsible for the accuracy and completeness of the submitted information. The form is in six parts.

#### 1. Identifying information.

#### 2. The work under consideration for publication.

This section asks for information about the work that you have submitted for publication. The time frame for this reporting is that of the work itself, from the initial conception and planning to the present. The requested information is about resources that you received, either directly or indirectly (via your institution), to enable you to complete the work. Checking "No" means that you did the work without receiving any financial support from any third party -- that is, the work was supported by funds from the same institution that pays your salary and that institution did not receive third-party funds with which to pay you. If you or your institution received funds from a third party to support the work, such as a government granting agency, charitable foundation or commercial sponsor, check "Yes".

#### 3. Relevant financial activities outside the submitted work.

This section asks about your financial relationships with entities in the bio-medical arena that could be perceived to influence, or that give the appearance of potentially influencing, what you wrote in the submitted work. You should disclose interactions with ANY entity that could be considered broadly relevant to the work. For example, if your article is about testing an epidermal growth factor receptor (EGFR) antagonist in lung cancer, you should report all associations with entities pursuing diagnostic or therapeutic strategies in cancer in general, not just in the area of EGFR or lung cancer.

Report all sources of revenue paid (or promised to be paid) directly to you or your institution on your behalf over the 36 months prior to submission of the work. This should include all monies from sources with relevance to the submitted work, not just monies from the entity that sponsored the research. Please note that your interactions with the work's sponsor that are outside the submitted work should also be listed here. If there is any question, it is usually better to disclose a relationship than not to do so.

For grants you have received for work outside the submitted work, you should disclose support ONLY from entities that could be perceived to be affected financially by the published work, such as drug companies, or foundations supported by entities that could be perceived to have a financial stake in the outcome. Public funding sources, such as government agencies, charitable foundations or academic institutions, need not be disclosed. For example, if a government agency sponsored a study in which you have been involved and drugs were provided by a pharmaceutical company, you need only list the pharmaceutical company.

#### 4. Intellectual Property.

This section asks about patents and copyrights, whether pending, issued, licensed and/or receiving royalties.

#### 5. Relationships not covered above.

Use this section to report other relationships or activities that readers could perceive to have influenced, or that give the appearance of potentially influencing, what you wrote in the submitted work.

#### Definitions.

**Entity:** government agency, foundation, commercial sponsor, academic institution, etc.

**Grant:** A grant from an entity, generally [but not always] paid to your organization

**Personal Fees:** Monies paid to you for services rendered, generally honoraria, royalties, or fees for consulting, lectures, speakers bureaus, expert testimony, employment, or other affiliations

**Non-Financial Support:** Examples include drugs/equipment supplied by the entity, travel paid by the entity, writing assistance, administrative support, etc.

**Other:** Anything not covered under the previous three boxes

**Pending:** The patent has been filed but not issued

**Issued:** The patent has been issued by the agency

**Licensed:** The patent has been licensed to an entity, whether earning royalties or not

**Royalties:** Funds are coming in to you or your institution due to your patent

## ICMJE Form for Disclosure of Potential Conflicts of Interest

### Section 1. Identifying Information

|                                                                                                                                     |                                                                     |                             |
|-------------------------------------------------------------------------------------------------------------------------------------|---------------------------------------------------------------------|-----------------------------|
| 1. Given Name (First Name)<br>Nurdan                                                                                                | 2. Surname (Last Name)<br>Guldiken                                  | 3. Date                     |
| 4. Are you the corresponding author?                                                                                                | <input type="checkbox"/> Yes <input checked="" type="checkbox"/> No | Corresponding Author's Name |
| 5. Manuscript Title<br>Hsp72 protects from liver injury via attenuation of hepatocellular death, oxidative stress and JNK-signaling |                                                                     |                             |
| 6. Manuscript Identifying Number (if you know it)<br>JHEPAT-D- 17-00645                                                             |                                                                     |                             |

### Section 2. The Work Under Consideration for Publication

Did you or your institution **at any time** receive payment or services from a third party (government, commercial, private foundation, etc.) for any aspect of the submitted work (including but not limited to grants, data monitoring board, study design, manuscript preparation, statistical analysis, etc.)?

Are there any relevant conflicts of interest?  Yes  No

### Section 3. Relevant financial activities outside the submitted work.

Place a check in the appropriate boxes in the table to indicate whether you have financial relationships (regardless of amount of compensation) with entities as described in the instructions. Use one line for each entity; add as many lines as you need by clicking the "Add +" box. You should report relationships that were **present during the 36 months prior to publication**.

Are there any relevant conflicts of interest?  Yes  No

### Section 4. Intellectual Property -- Patents & Copyrights

Do you have any patents, whether planned, pending or issued, broadly relevant to the work?  Yes  No

## ICMJE Form for Disclosure of Potential Conflicts of Interest

---

### Section 5. Relationships not covered above

Are there other relationships or activities that readers could perceive to have influenced, or that give the appearance of potentially influencing, what you wrote in the submitted work?

- Yes, the following relationships/conditions/circumstances are present (explain below):
- No other relationships/conditions/circumstances that present a potential conflict of interest

At the time of manuscript acceptance, journals will ask authors to confirm and, if necessary, update their disclosure statements. On occasion, journals may ask authors to disclose further information about reported relationships.

### Section 6. Disclosure Statement

Based on the above disclosures, this form will automatically generate a disclosure statement, which will appear in the box below.

No conflict of ineterest

### Evaluation and Feedback

Please visit <http://www.icmje.org/cgi-bin/feedback> to provide feedback on your experience with completing this form.

## ICMJE Form for Disclosure of Potential Conflicts of Interest

### Instructions

The purpose of this form is to provide readers of your manuscript with information about your other interests that could influence how they receive and understand your work. The form is designed to be completed electronically and stored electronically. It contains programming that allows appropriate data display. Each author should submit a separate form and is responsible for the accuracy and completeness of the submitted information. The form is in six parts.

#### 1. Identifying information.

#### 2. The work under consideration for publication.

This section asks for information about the work that you have submitted for publication. The time frame for this reporting is that of the work itself, from the initial conception and planning to the present. The requested information is about resources that you received, either directly or indirectly (via your institution), to enable you to complete the work. Checking "No" means that you did the work without receiving any financial support from any third party -- that is, the work was supported by funds from the same institution that pays your salary and that institution did not receive third-party funds with which to pay you. If you or your institution received funds from a third party to support the work, such as a government granting agency, charitable foundation or commercial sponsor, check "Yes".

#### 3. Relevant financial activities outside the submitted work.

This section asks about your financial relationships with entities in the bio-medical arena that could be perceived to influence, or that give the appearance of potentially influencing, what you wrote in the submitted work. You should disclose interactions with ANY entity that could be considered broadly relevant to the work. For example, if your article is about testing an epidermal growth factor receptor (EGFR) antagonist in lung cancer, you should report all associations with entities pursuing diagnostic or therapeutic strategies in cancer in general, not just in the area of EGFR or lung cancer.

Report all sources of revenue paid (or promised to be paid) directly to you or your institution on your behalf over the 36 months prior to submission of the work. This should include all monies from sources with relevance to the submitted work, not just monies from the entity that sponsored the research. Please note that your interactions with the work's sponsor that are outside the submitted work should also be listed here. If there is any question, it is usually better to disclose a relationship than not to do so.

For grants you have received for work outside the submitted work, you should disclose support ONLY from entities that could be perceived to be affected financially by the published work, such as drug companies, or foundations supported by entities that could be perceived to have a financial stake in the outcome. Public funding sources, such as government agencies, charitable foundations or academic institutions, need not be disclosed. For example, if a government agency sponsored a study in which you have been involved and drugs were provided by a pharmaceutical company, you need only list the pharmaceutical company.

#### 4. Intellectual Property.

This section asks about patents and copyrights, whether pending, issued, licensed and/or receiving royalties.

#### 5. Relationships not covered above.

Use this section to report other relationships or activities that readers could perceive to have influenced, or that give the appearance of potentially influencing, what you wrote in the submitted work.

#### Definitions.

**Entity:** government agency, foundation, commercial sponsor, academic institution, etc.

**Grant:** A grant from an entity, generally [but not always] paid to your organization

**Personal Fees:** Monies paid to you for services rendered, generally honoraria, royalties, or fees for consulting, lectures, speakers bureaus, expert testimony, employment, or other affiliations

**Non-Financial Support:** Examples include drugs/equipment supplied by the entity, travel paid by the entity, writing assistance, administrative support, etc.

**Other:** Anything not covered under the previous three boxes

**Pending:** The patent has been filed but not issued

**Issued:** The patent has been issued by the agency

**Licensed:** The patent has been licensed to an entity, whether earning royalties or not

**Royalties:** Funds are coming in to you or your institution due to your patent

## ICMJE Form for Disclosure of Potential Conflicts of Interest

### Section 1. Identifying Information

1. Given Name (First Name)

Pavel

2. Surname (Last Name)

Strnad

3. Date

14-December-2017

4. Are you the corresponding author?

Yes  No

5. Manuscript Title

Hsp72 protects from liver injury via attenuation of hepatocellular death, oxidative stress and JNK-signaling

6. Manuscript Identifying Number (if you know it)

JHEPAT-D-17-00645R2

### Section 2. The Work Under Consideration for Publication

Did you or your institution **at any time** receive payment or services from a third party (government, commercial, private foundation, etc.) for any aspect of the submitted work (including but not limited to grants, data monitoring board, study design, manuscript preparation, statistical analysis, etc.)?

Are there any relevant conflicts of interest?  Yes  No

### Section 3. Relevant financial activities outside the submitted work.

Place a check in the appropriate boxes in the table to indicate whether you have financial relationships (regardless of amount of compensation) with entities as described in the instructions. Use one line for each entity; add as many lines as you need by clicking the "Add +" box. You should report relationships that were **present during the 36 months prior to publication**.

Are there any relevant conflicts of interest?  Yes  No

### Section 4. Intellectual Property -- Patents & Copyrights

Do you have any patents, whether planned, pending or issued, broadly relevant to the work?  Yes  No

## ICMJE Form for Disclosure of Potential Conflicts of Interest

---

### Section 5. Relationships not covered above

Are there other relationships or activities that readers could perceive to have influenced, or that give the appearance of potentially influencing, what you wrote in the submitted work?

- Yes, the following relationships/conditions/circumstances are present (explain below):
- No other relationships/conditions/circumstances that present a potential conflict of interest

At the time of manuscript acceptance, journals will ask authors to confirm and, if necessary, update their disclosure statements. On occasion, journals may ask authors to disclose further information about reported relationships.

### Section 6. Disclosure Statement

Based on the above disclosures, this form will automatically generate a disclosure statement, which will appear in the box below.

Dr. Strnad has nothing to disclose.

### Evaluation and Feedback

Please visit <http://www.icmje.org/cgi-bin/feedback> to provide feedback on your experience with completing this form.

## ICMJE Form for Disclosure of Potential Conflicts of Interest

### Instructions

The purpose of this form is to provide readers of your manuscript with information about your other interests that could influence how they receive and understand your work. The form is designed to be completed electronically and stored electronically. It contains programming that allows appropriate data display. Each author should submit a separate form and is responsible for the accuracy and completeness of the submitted information. The form is in six parts.

#### 1. Identifying information.

#### 2. The work under consideration for publication.

This section asks for information about the work that you have submitted for publication. The time frame for this reporting is that of the work itself, from the initial conception and planning to the present. The requested information is about resources that you received, either directly or indirectly (via your institution), to enable you to complete the work. Checking "No" means that you did the work without receiving any financial support from any third party -- that is, the work was supported by funds from the same institution that pays your salary and that institution did not receive third-party funds with which to pay you. If you or your institution received funds from a third party to support the work, such as a government granting agency, charitable foundation or commercial sponsor, check "Yes".

#### 3. Relevant financial activities outside the submitted work.

This section asks about your financial relationships with entities in the bio-medical arena that could be perceived to influence, or that give the appearance of potentially influencing, what you wrote in the submitted work. You should disclose interactions with ANY entity that could be considered broadly relevant to the work. For example, if your article is about testing an epidermal growth factor receptor (EGFR) antagonist in lung cancer, you should report all associations with entities pursuing diagnostic or therapeutic strategies in cancer in general, not just in the area of EGFR or lung cancer.

Report all sources of revenue paid (or promised to be paid) directly to you or your institution on your behalf over the 36 months prior to submission of the work. This should include all monies from sources with relevance to the submitted work, not just monies from the entity that sponsored the research. Please note that your interactions with the work's sponsor that are outside the submitted work should also be listed here. If there is any question, it is usually better to disclose a relationship than not to do so.

For grants you have received for work outside the submitted work, you should disclose support ONLY from entities that could be perceived to be affected financially by the published work, such as drug companies, or foundations supported by entities that could be perceived to have a financial stake in the outcome. Public funding sources, such as government agencies, charitable foundations or academic institutions, need not be disclosed. For example, if a government agency sponsored a study in which you have been involved and drugs were provided by a pharmaceutical company, you need only list the pharmaceutical company.

#### 4. Intellectual Property.

This section asks about patents and copyrights, whether pending, issued, licensed and/or receiving royalties.

#### 5. Relationships not covered above.

Use this section to report other relationships or activities that readers could perceive to have influenced, or that give the appearance of potentially influencing, what you wrote in the submitted work.

#### Definitions.

**Entity:** government agency, foundation, commercial sponsor, academic institution, etc.

**Grant:** A grant from an entity, generally [but not always] paid to your organization

**Personal Fees:** Monies paid to you for services rendered, generally honoraria, royalties, or fees for consulting, lectures, speakers bureaus, expert testimony, employment, or other affiliations

**Non-Financial Support:** Examples include drugs/equipment supplied by the entity, travel paid by the entity, writing assistance, administrative support, etc.

**Other:** Anything not covered under the previous three boxes

**Pending:** The patent has been filed but not issued

**Issued:** The patent has been issued by the agency

**Licensed:** The patent has been licensed to an entity, whether earning royalties or not

**Royalties:** Funds are coming in to you or your institution due to your patent



## ICMJE Form for Disclosure of Potential Conflicts of Interest

### Section 1. Identifying Information

|                                                                                                                                     |                                                                     |                                             |
|-------------------------------------------------------------------------------------------------------------------------------------|---------------------------------------------------------------------|---------------------------------------------|
| 1. Given Name (First Name)<br>Fa-Rong                                                                                               | 2. Surname (Last Name)<br>Mo                                        | 3. Date<br>14-December-2017                 |
| 4. Are you the corresponding author?                                                                                                | <input type="checkbox"/> Yes <input checked="" type="checkbox"/> No | Corresponding Author's Name<br>Pavel Strnad |
| 5. Manuscript Title<br>Hsp72 protects from liver injury via attenuation of hepatocellular death, oxidative stress and JNK-signaling |                                                                     |                                             |
| 6. Manuscript Identifying Number (if you know it)                                                                                   |                                                                     |                                             |

### Section 2. The Work Under Consideration for Publication

Did you or your institution **at any time** receive payment or services from a third party (government, commercial, private foundation, etc.) for any aspect of the submitted work (including but not limited to grants, data monitoring board, study design, manuscript preparation, statistical analysis, etc.)?

Are there any relevant conflicts of interest?  Yes  No

### Section 3. Relevant financial activities outside the submitted work.

Place a check in the appropriate boxes in the table to indicate whether you have financial relationships (regardless of amount of compensation) with entities as described in the instructions. Use one line for each entity; add as many lines as you need by clicking the "Add +" box. You should report relationships that were **present during the 36 months prior to publication**.

Are there any relevant conflicts of interest?  Yes  No

### Section 4. Intellectual Property -- Patents & Copyrights

Do you have any patents, whether planned, pending or issued, broadly relevant to the work?  Yes  No

## ICMJE Form for Disclosure of Potential Conflicts of Interest

---

### Section 5. Relationships not covered above

Are there other relationships or activities that readers could perceive to have influenced, or that give the appearance of potentially influencing, what you wrote in the submitted work?

- Yes, the following relationships/conditions/circumstances are present (explain below):
- No other relationships/conditions/circumstances that present a potential conflict of interest

At the time of manuscript acceptance, journals will ask authors to confirm and, if necessary, update their disclosure statements. On occasion, journals may ask authors to disclose further information about reported relationships.

### Section 6. Disclosure Statement

Based on the above disclosures, this form will automatically generate a disclosure statement, which will appear in the box below.

Dr. Mo has nothing to disclose.

### Evaluation and Feedback

Please visit <http://www.icmje.org/cgi-bin/feedback> to provide feedback on your experience with completing this form.

## ICMJE Form for Disclosure of Potential Conflicts of Interest

### Instructions

The purpose of this form is to provide readers of your manuscript with information about your other interests that could influence how they receive and understand your work. The form is designed to be completed electronically and stored electronically. It contains programming that allows appropriate data display. Each author should submit a separate form and is responsible for the accuracy and completeness of the submitted information. The form is in six parts.

#### 1. Identifying information.

#### 2. The work under consideration for publication.

This section asks for information about the work that you have submitted for publication. The time frame for this reporting is that of the work itself, from the initial conception and planning to the present. The requested information is about resources that you received, either directly or indirectly (via your institution), to enable you to complete the work. Checking "No" means that you did the work without receiving any financial support from any third party -- that is, the work was supported by funds from the same institution that pays your salary and that institution did not receive third-party funds with which to pay you. If you or your institution received funds from a third party to support the work, such as a government granting agency, charitable foundation or commercial sponsor, check "Yes".

#### 3. Relevant financial activities outside the submitted work.

This section asks about your financial relationships with entities in the bio-medical arena that could be perceived to influence, or that give the appearance of potentially influencing, what you wrote in the submitted work. You should disclose interactions with ANY entity that could be considered broadly relevant to the work. For example, if your article is about testing an epidermal growth factor receptor (EGFR) antagonist in lung cancer, you should report all associations with entities pursuing diagnostic or therapeutic strategies in cancer in general, not just in the area of EGFR or lung cancer.

Report all sources of revenue paid (or promised to be paid) directly to you or your institution on your behalf over the 36 months prior to submission of the work. This should include all monies from sources with relevance to the submitted work, not just monies from the entity that sponsored the research. Please note that your interactions with the work's sponsor that are outside the submitted work should also be listed here. If there is any question, it is usually better to disclose a relationship than not to do so.

For grants you have received for work outside the submitted work, you should disclose support ONLY from entities that could be perceived to be affected financially by the published work, such as drug companies, or foundations supported by entities that could be perceived to have a financial stake in the outcome. Public funding sources, such as government agencies, charitable foundations or academic institutions, need not be disclosed. For example, if a government agency sponsored a study in which you have been involved and drugs were provided by a pharmaceutical company, you need only list the pharmaceutical company.

#### 4. Intellectual Property.

This section asks about patents and copyrights, whether pending, issued, licensed and/or receiving royalties.

#### 5. Relationships not covered above.

Use this section to report other relationships or activities that readers could perceive to have influenced, or that give the appearance of potentially influencing, what you wrote in the submitted work.

#### Definitions.

**Entity:** government agency, foundation, commercial sponsor, academic institution, etc.

**Grant:** A grant from an entity, generally [but not always] paid to your organization

**Personal Fees:** Monies paid to you for services rendered, generally honoraria, royalties, or fees for consulting, lectures, speakers bureaus, expert testimony, employment, or other affiliations

**Non-Financial Support:** Examples include drugs/equipment supplied by the entity, travel paid by the entity, writing assistance, administrative support, etc.

**Other:** Anything not covered under the previous three boxes

**Pending:** The patent has been filed but not issued

**Issued:** The patent has been issued by the agency

**Licensed:** The patent has been licensed to an entity, whether earning royalties or not

**Royalties:** Funds are coming in to you or your institution due to your patent

## ICMJE Form for Disclosure of Potential Conflicts of Interest

### Section 1. Identifying Information

1. Given Name (First Name)

Daniel

2. Surname (Last Name)

Hartmann

3. Date

13-December-2017

4. Are you the corresponding author?

Yes  No

Corresponding Author's Name

Pavel Strnad

5. Manuscript Title

Hsp72 protects from liver injury via attenuation of hepatocellular death, oxidative stress and JNK-signaling

6. Manuscript Identifying Number (if you know it)

### Section 2. The Work Under Consideration for Publication

Did you or your institution **at any time** receive payment or services from a third party (government, commercial, private foundation, etc.) for any aspect of the submitted work (including but not limited to grants, data monitoring board, study design, manuscript preparation, statistical analysis, etc.)?

Are there any relevant conflicts of interest?  Yes  No

### Section 3. Relevant financial activities outside the submitted work.

Place a check in the appropriate boxes in the table to indicate whether you have financial relationships (regardless of amount of compensation) with entities as described in the instructions. Use one line for each entity; add as many lines as you need by clicking the "Add +" box. You should report relationships that were **present during the 36 months prior to publication**.

Are there any relevant conflicts of interest?  Yes  No

### Section 4. Intellectual Property -- Patents & Copyrights

Do you have any patents, whether planned, pending or issued, broadly relevant to the work?  Yes  No

## ICMJE Form for Disclosure of Potential Conflicts of Interest

---

### Section 5. Relationships not covered above

Are there other relationships or activities that readers could perceive to have influenced, or that give the appearance of potentially influencing, what you wrote in the submitted work?

- Yes, the following relationships/conditions/circumstances are present (explain below):
- No other relationships/conditions/circumstances that present a potential conflict of interest

At the time of manuscript acceptance, journals will ask authors to confirm and, if necessary, update their disclosure statements. On occasion, journals may ask authors to disclose further information about reported relationships.

### Section 6. Disclosure Statement

Based on the above disclosures, this form will automatically generate a disclosure statement, which will appear in the box below.

Dr. Hartmann has nothing to disclose.

### Evaluation and Feedback

Please visit <http://www.icmje.org/cgi-bin/feedback> to provide feedback on your experience with completing this form.

## ICMJE Form for Disclosure of Potential Conflicts of Interest

### Instructions

The purpose of this form is to provide readers of your manuscript with information about your other interests that could influence how they receive and understand your work. The form is designed to be completed electronically and stored electronically. It contains programming that allows appropriate data display. Each author should submit a separate form and is responsible for the accuracy and completeness of the submitted information. The form is in six parts.

#### 1. Identifying information.

#### 2. The work under consideration for publication.

This section asks for information about the work that you have submitted for publication. The time frame for this reporting is that of the work itself, from the initial conception and planning to the present. The requested information is about resources that you received, either directly or indirectly (via your institution), to enable you to complete the work. Checking "No" means that you did the work without receiving any financial support from any third party -- that is, the work was supported by funds from the same institution that pays your salary and that institution did not receive third-party funds with which to pay you. If you or your institution received funds from a third party to support the work, such as a government granting agency, charitable foundation or commercial sponsor, check "Yes".

#### 3. Relevant financial activities outside the submitted work.

This section asks about your financial relationships with entities in the bio-medical arena that could be perceived to influence, or that give the appearance of potentially influencing, what you wrote in the submitted work. You should disclose interactions with ANY entity that could be considered broadly relevant to the work. For example, if your article is about testing an epidermal growth factor receptor (EGFR) antagonist in lung cancer, you should report all associations with entities pursuing diagnostic or therapeutic strategies in cancer in general, not just in the area of EGFR or lung cancer.

Report all sources of revenue paid (or promised to be paid) directly to you or your institution on your behalf over the 36 months prior to submission of the work. This should include all monies from sources with relevance to the submitted work, not just monies from the entity that sponsored the research. Please note that your interactions with the work's sponsor that are outside the submitted work should also be listed here. If there is any question, it is usually better to disclose a relationship than not to do so.

For grants you have received for work outside the submitted work, you should disclose support ONLY from entities that could be perceived to be affected financially by the published work, such as drug companies, or foundations supported by entities that could be perceived to have a financial stake in the outcome. Public funding sources, such as government agencies, charitable foundations or academic institutions, need not be disclosed. For example, if a government agency sponsored a study in which you have been involved and drugs were provided by a pharmaceutical company, you need only list the pharmaceutical company.

#### 4. Intellectual Property.

This section asks about patents and copyrights, whether pending, issued, licensed and/or receiving royalties.

#### 5. Relationships not covered above.

Use this section to report other relationships or activities that readers could perceive to have influenced, or that give the appearance of potentially influencing, what you wrote in the submitted work.

#### Definitions.

**Entity:** government agency, foundation, commercial sponsor, academic institution, etc.

**Grant:** A grant from an entity, generally [but not always] paid to your organization

**Personal Fees:** Monies paid to you for services rendered, generally honoraria, royalties, or fees for consulting, lectures, speakers bureaus, expert testimony, employment, or other affiliations

**Non-Financial Support:** Examples include drugs/equipment supplied by the entity, travel paid by the entity, writing assistance, administrative support, etc.

**Other:** Anything not covered under the previous three boxes

**Pending:** The patent has been filed but not issued

**Issued:** The patent has been issued by the agency

**Licensed:** The patent has been licensed to an entity, whether earning royalties or not

**Royalties:** Funds are coming in to you or your institution due to your patent

## ICMJE Form for Disclosure of Potential Conflicts of Interest

### Section 1. Identifying Information

1. Given Name (First Name)

Norbert

2. Surname (Last Name)

Hüser

3. Date

13-December-2017

4. Are you the corresponding author?

Yes  No

Corresponding Author's Name

Pavel Strnad

5. Manuscript Title

Hsp72 protects from liver injury via attenuation of hepatocellular death, oxidative stress and JNK-signaling

6. Manuscript Identifying Number (if you know it)

### Section 2. The Work Under Consideration for Publication

Did you or your institution **at any time** receive payment or services from a third party (government, commercial, private foundation, etc.) for any aspect of the submitted work (including but not limited to grants, data monitoring board, study design, manuscript preparation, statistical analysis, etc.)?

Are there any relevant conflicts of interest?  Yes  No

### Section 3. Relevant financial activities outside the submitted work.

Place a check in the appropriate boxes in the table to indicate whether you have financial relationships (regardless of amount of compensation) with entities as described in the instructions. Use one line for each entity; add as many lines as you need by clicking the "Add +" box. You should report relationships that were **present during the 36 months prior to publication**.

Are there any relevant conflicts of interest?  Yes  No

### Section 4. Intellectual Property -- Patents & Copyrights

Do you have any patents, whether planned, pending or issued, broadly relevant to the work?  Yes  No

## ICMJE Form for Disclosure of Potential Conflicts of Interest

---

### Section 5. Relationships not covered above

Are there other relationships or activities that readers could perceive to have influenced, or that give the appearance of potentially influencing, what you wrote in the submitted work?

- Yes, the following relationships/conditions/circumstances are present (explain below):
- No other relationships/conditions/circumstances that present a potential conflict of interest

At the time of manuscript acceptance, journals will ask authors to confirm and, if necessary, update their disclosure statements. On occasion, journals may ask authors to disclose further information about reported relationships.

### Section 6. Disclosure Statement

Based on the above disclosures, this form will automatically generate a disclosure statement, which will appear in the box below.

Dr. Hüser has nothing to disclose.

### Evaluation and Feedback

Please visit <http://www.icmje.org/cgi-bin/feedback> to provide feedback on your experience with completing this form.



## ICMJE Form for Disclosure of Potential Conflicts of Interest

### Instructions

The purpose of this form is to provide readers of your manuscript with information about your other interests that could influence how they receive and understand your work. The form is designed to be completed electronically and stored electronically. It contains programming that allows appropriate data display. Each author should submit a separate form and is responsible for the accuracy and completeness of the submitted information. The form is in six parts.

#### 1. Identifying information.

#### 2. The work under consideration for publication.

This section asks for information about the work that you have submitted for publication. The time frame for this reporting is that of the work itself, from the initial conception and planning to the present. The requested information is about resources that you received, either directly or indirectly (via your institution), to enable you to complete the work. Checking "No" means that you did the work without receiving any financial support from any third party -- that is, the work was supported by funds from the same institution that pays your salary and that institution did not receive third-party funds with which to pay you. If you or your institution received funds from a third party to support the work, such as a government granting agency, charitable foundation or commercial sponsor, check "Yes".

#### 3. Relevant financial activities outside the submitted work.

This section asks about your financial relationships with entities in the bio-medical arena that could be perceived to influence, or that give the appearance of potentially influencing, what you wrote in the submitted work. You should disclose interactions with ANY entity that could be considered broadly relevant to the work. For example, if your article is about testing an epidermal growth factor receptor (EGFR) antagonist in lung cancer, you should report all associations with entities pursuing diagnostic or therapeutic strategies in cancer in general, not just in the area of EGFR or lung cancer.

Report all sources of revenue paid (or promised to be paid) directly to you or your institution on your behalf over the 36 months prior to submission of the work. This should include all monies from sources with relevance to the submitted work, not just monies from the entity that sponsored the research. Please note that your interactions with the work's sponsor that are outside the submitted work should also be listed here. If there is any question, it is usually better to disclose a relationship than not to do so.

For grants you have received for work outside the submitted work, you should disclose support ONLY from entities that could be perceived to be affected financially by the published work, such as drug companies, or foundations supported by entities that could be perceived to have a financial stake in the outcome. Public funding sources, such as government agencies, charitable foundations or academic institutions, need not be disclosed. For example, if a government agency sponsored a study in which you have been involved and drugs were provided by a pharmaceutical company, you need only list the pharmaceutical company.

#### 4. Intellectual Property.

This section asks about patents and copyrights, whether pending, issued, licensed and/or receiving royalties.

#### 5. Relationships not covered above.

Use this section to report other relationships or activities that readers could perceive to have influenced, or that give the appearance of potentially influencing, what you wrote in the submitted work.

#### Definitions.

**Entity:** government agency, foundation, commercial sponsor, academic institution, etc.

**Grant:** A grant from an entity, generally [but not always] paid to your organization

**Personal Fees:** Monies paid to you for services rendered, generally honoraria, royalties, or fees for consulting, lectures, speakers bureaus, expert testimony, employment, or other affiliations

**Non-Financial Support:** Examples include drugs/equipment supplied by the entity, travel paid by the entity, writing assistance, administrative support, etc.

**Other:** Anything not covered under the previous three boxes

**Pending:** The patent has been filed but not issued

**Issued:** The patent has been issued by the agency

**Licensed:** The patent has been licensed to an entity, whether earning royalties or not

**Royalties:** Funds are coming in to you or your institution due to your patent

## ICMJE Form for Disclosure of Potential Conflicts of Interest

### Section 1. Identifying Information

1. Given Name (First Name)

Johannes

2. Surname (Last Name)

Haybaeck

3. Date

14-December-2017

4. Are you the corresponding author?

Yes  No

Corresponding Author's Name

Pavel Strnad

5. Manuscript Title

Hsp72 protects from liver injury via attenuation of hepatocellular death, oxidative stress and JNK-signaling

6. Manuscript Identifying Number (if you know it)

JHEPAT-D- 17-00645

### Section 2. The Work Under Consideration for Publication

Did you or your institution **at any time** receive payment or services from a third party (government, commercial, private foundation, etc.) for any aspect of the submitted work (including but not limited to grants, data monitoring board, study design, manuscript preparation, statistical analysis, etc.)?

Are there any relevant conflicts of interest?  Yes  No

### Section 3. Relevant financial activities outside the submitted work.

Place a check in the appropriate boxes in the table to indicate whether you have financial relationships (regardless of amount of compensation) with entities as described in the instructions. Use one line for each entity; add as many lines as you need by clicking the "Add +" box. You should report relationships that were **present during the 36 months prior to publication**.

Are there any relevant conflicts of interest?  Yes  No

### Section 4. Intellectual Property -- Patents & Copyrights

Do you have any patents, whether planned, pending or issued, broadly relevant to the work?  Yes  No

## ICMJE Form for Disclosure of Potential Conflicts of Interest

---

### Section 5. Relationships not covered above

Are there other relationships or activities that readers could perceive to have influenced, or that give the appearance of potentially influencing, what you wrote in the submitted work?

- Yes, the following relationships/conditions/circumstances are present (explain below):
- No other relationships/conditions/circumstances that present a potential conflict of interest

At the time of manuscript acceptance, journals will ask authors to confirm and, if necessary, update their disclosure statements. On occasion, journals may ask authors to disclose further information about reported relationships.

### Section 6. Disclosure Statement

Based on the above disclosures, this form will automatically generate a disclosure statement, which will appear in the box below.

Dr. Haybaeck has nothing to disclose.

### Evaluation and Feedback

Please visit <http://www.icmje.org/cgi-bin/feedback> to provide feedback on your experience with completing this form.

## ICMJE Form for Disclosure of Potential Conflicts of Interest

### Instructions

The purpose of this form is to provide readers of your manuscript with information about your other interests that could influence how they receive and understand your work. The form is designed to be completed electronically and stored electronically. It contains programming that allows appropriate data display. Each author should submit a separate form and is responsible for the accuracy and completeness of the submitted information. The form is in six parts.

#### 1. Identifying information.

#### 2. The work under consideration for publication.

This section asks for information about the work that you have submitted for publication. The time frame for this reporting is that of the work itself, from the initial conception and planning to the present. The requested information is about resources that you received, either directly or indirectly (via your institution), to enable you to complete the work. Checking "No" means that you did the work without receiving any financial support from any third party -- that is, the work was supported by funds from the same institution that pays your salary and that institution did not receive third-party funds with which to pay you. If you or your institution received funds from a third party to support the work, such as a government granting agency, charitable foundation or commercial sponsor, check "Yes".

#### 3. Relevant financial activities outside the submitted work.

This section asks about your financial relationships with entities in the bio-medical arena that could be perceived to influence, or that give the appearance of potentially influencing, what you wrote in the submitted work. You should disclose interactions with ANY entity that could be considered broadly relevant to the work. For example, if your article is about testing an epidermal growth factor receptor (EGFR) antagonist in lung cancer, you should report all associations with entities pursuing diagnostic or therapeutic strategies in cancer in general, not just in the area of EGFR or lung cancer.

Report all sources of revenue paid (or promised to be paid) directly to you or your institution on your behalf over the 36 months prior to submission of the work. This should include all monies from sources with relevance to the submitted work, not just monies from the entity that sponsored the research. Please note that your interactions with the work's sponsor that are outside the submitted work should also be listed here. If there is any question, it is usually better to disclose a relationship than not to do so.

For grants you have received for work outside the submitted work, you should disclose support ONLY from entities that could be perceived to be affected financially by the published work, such as drug companies, or foundations supported by entities that could be perceived to have a financial stake in the outcome. Public funding sources, such as government agencies, charitable foundations or academic institutions, need not be disclosed. For example, if a government agency sponsored a study in which you have been involved and drugs were provided by a pharmaceutical company, you need only list the pharmaceutical company.

#### 4. Intellectual Property.

This section asks about patents and copyrights, whether pending, issued, licensed and/or receiving royalties.

#### 5. Relationships not covered above.

Use this section to report other relationships or activities that readers could perceive to have influenced, or that give the appearance of potentially influencing, what you wrote in the submitted work.

#### Definitions.

**Entity:** government agency, foundation, commercial sponsor, academic institution, etc.

**Grant:** A grant from an entity, generally [but not always] paid to your organization

**Personal Fees:** Monies paid to you for services rendered, generally honoraria, royalties, or fees for consulting, lectures, speakers bureaus, expert testimony, employment, or other affiliations

**Non-Financial Support:** Examples include drugs/equipment supplied by the entity, travel paid by the entity, writing assistance, administrative support, etc.

**Other:** Anything not covered under the previous three boxes

**Pending:** The patent has been filed but not issued

**Issued:** The patent has been issued by the agency

**Licensed:** The patent has been licensed to an entity, whether earning royalties or not

**Royalties:** Funds are coming in to you or your institution due to your patent

## ICMJE Form for Disclosure of Potential Conflicts of Interest

### Section 1. Identifying Information

1. Given Name (First Name)

Kateryna

2. Surname (Last Name)

Levada

3. Date

18-December-2017

4. Are you the corresponding author?

Yes  No

Corresponding Author's Name

Pavel Strnad

5. Manuscript Title

Hsp72 protects from liver injury via attenuation of hepatocellular death, oxidative stress and JNK-signaling

6. Manuscript Identifying Number (if you know it)

JHEPAT-D-17-00645R2

### Section 2. The Work Under Consideration for Publication

Did you or your institution **at any time** receive payment or services from a third party (government, commercial, private foundation, etc.) for any aspect of the submitted work (including but not limited to grants, data monitoring board, study design, manuscript preparation, statistical analysis, etc.)?

Are there any relevant conflicts of interest?  Yes  No

### Section 3. Relevant financial activities outside the submitted work.

Place a check in the appropriate boxes in the table to indicate whether you have financial relationships (regardless of amount of compensation) with entities as described in the instructions. Use one line for each entity; add as many lines as you need by clicking the "Add +" box. You should report relationships that were **present during the 36 months prior to publication**.

Are there any relevant conflicts of interest?  Yes  No

### Section 4. Intellectual Property -- Patents & Copyrights

Do you have any patents, whether planned, pending or issued, broadly relevant to the work?  Yes  No

## ICMJE Form for Disclosure of Potential Conflicts of Interest

---

### Section 5. Relationships not covered above

Are there other relationships or activities that readers could perceive to have influenced, or that give the appearance of potentially influencing, what you wrote in the submitted work?

- Yes, the following relationships/conditions/circumstances are present (explain below):
- No other relationships/conditions/circumstances that present a potential conflict of interest

At the time of manuscript acceptance, journals will ask authors to confirm and, if necessary, update their disclosure statements. On occasion, journals may ask authors to disclose further information about reported relationships.

### Section 6. Disclosure Statement

Based on the above disclosures, this form will automatically generate a disclosure statement, which will appear in the box below.

Dr. Levada has nothing to disclose.

### Evaluation and Feedback

Please visit <http://www.icmje.org/cgi-bin/feedback> to provide feedback on your experience with completing this form.

## ICMJE Form for Disclosure of Potential Conflicts of Interest

### Instructions

The purpose of this form is to provide readers of your manuscript with information about your other interests that could influence how they receive and understand your work. The form is designed to be completed electronically and stored electronically. It contains programming that allows appropriate data display. Each author should submit a separate form and is responsible for the accuracy and completeness of the submitted information. The form is in six parts.

#### 1. Identifying information.

#### 2. The work under consideration for publication.

This section asks for information about the work that you have submitted for publication. The time frame for this reporting is that of the work itself, from the initial conception and planning to the present. The requested information is about resources that you received, either directly or indirectly (via your institution), to enable you to complete the work. Checking "No" means that you did the work without receiving any financial support from any third party -- that is, the work was supported by funds from the same institution that pays your salary and that institution did not receive third-party funds with which to pay you. If you or your institution received funds from a third party to support the work, such as a government granting agency, charitable foundation or commercial sponsor, check "Yes".

#### 3. Relevant financial activities outside the submitted work.

This section asks about your financial relationships with entities in the bio-medical arena that could be perceived to influence, or that give the appearance of potentially influencing, what you wrote in the submitted work. You should disclose interactions with ANY entity that could be considered broadly relevant to the work. For example, if your article is about testing an epidermal growth factor receptor (EGFR) antagonist in lung cancer, you should report all associations with entities pursuing diagnostic or therapeutic strategies in cancer in general, not just in the area of EGFR or lung cancer.

Report all sources of revenue paid (or promised to be paid) directly to you or your institution on your behalf over the 36 months prior to submission of the work. This should include all monies from sources with relevance to the submitted work, not just monies from the entity that sponsored the research. Please note that your interactions with the work's sponsor that are outside the submitted work should also be listed here. If there is any question, it is usually better to disclose a relationship than not to do so.

For grants you have received for work outside the submitted work, you should disclose support ONLY from entities that could be perceived to be affected financially by the published work, such as drug companies, or foundations supported by entities that could be perceived to have a financial stake in the outcome. Public funding sources, such as government agencies, charitable foundations or academic institutions, need not be disclosed. For example, if a government agency sponsored a study in which you have been involved and drugs were provided by a pharmaceutical company, you need only list the pharmaceutical company.

#### 4. Intellectual Property.

This section asks about patents and copyrights, whether pending, issued, licensed and/or receiving royalties.

#### 5. Relationships not covered above.

Use this section to report other relationships or activities that readers could perceive to have influenced, or that give the appearance of potentially influencing, what you wrote in the submitted work.

#### Definitions.

**Entity:** government agency, foundation, commercial sponsor, academic institution, etc.

**Grant:** A grant from an entity, generally [but not always] paid to your organization

**Personal Fees:** Monies paid to you for services rendered, generally honoraria, royalties, or fees for consulting, lectures, speakers bureaus, expert testimony, employment, or other affiliations

**Non-Financial Support:** Examples include drugs/equipment supplied by the entity, travel paid by the entity, writing assistance, administrative support, etc.

**Other:** Anything not covered under the previous three boxes

**Pending:** The patent has been filed but not issued

**Issued:** The patent has been issued by the agency

**Licensed:** The patent has been licensed to an entity, whether earning royalties or not

**Royalties:** Funds are coming in to you or your institution due to your patent

## ICMJE Form for Disclosure of Potential Conflicts of Interest

### Section 1. Identifying Information

|                                                                                                                                     |                                                                     |                                             |
|-------------------------------------------------------------------------------------------------------------------------------------|---------------------------------------------------------------------|---------------------------------------------|
| 1. Given Name (First Name)<br>Thomas                                                                                                | 2. Surname (Last Name)<br>Ott                                       | 3. Date<br>18-December-2017                 |
| 4. Are you the corresponding author?                                                                                                | <input type="checkbox"/> Yes <input checked="" type="checkbox"/> No | Corresponding Author's Name<br>Pavel Strnad |
| 5. Manuscript Title<br>Hsp72 protects from liver injury via attenuation of hepatocellular death, oxidative stress and JNK-signaling |                                                                     |                                             |
| 6. Manuscript Identifying Number (if you know it)<br>_____                                                                          |                                                                     |                                             |

### Section 2. The Work Under Consideration for Publication

Did you or your institution **at any time** receive payment or services from a third party (government, commercial, private foundation, etc.) for any aspect of the submitted work (including but not limited to grants, data monitoring board, study design, manuscript preparation, statistical analysis, etc.)?

Are there any relevant conflicts of interest?  Yes  No

### Section 3. Relevant financial activities outside the submitted work.

Place a check in the appropriate boxes in the table to indicate whether you have financial relationships (regardless of amount of compensation) with entities as described in the instructions. Use one line for each entity; add as many lines as you need by clicking the "Add +" box. You should report relationships that were **present during the 36 months prior to publication**.

Are there any relevant conflicts of interest?  Yes  No

### Section 4. Intellectual Property -- Patents & Copyrights

Do you have any patents, whether planned, pending or issued, broadly relevant to the work?  Yes  No



## ICMJE Form for Disclosure of Potential Conflicts of Interest

---

### Section 5. Relationships not covered above

Are there other relationships or activities that readers could perceive to have influenced, or that give the appearance of potentially influencing, what you wrote in the submitted work?

- Yes, the following relationships/conditions/circumstances are present (explain below):
- No other relationships/conditions/circumstances that present a potential conflict of interest

At the time of manuscript acceptance, journals will ask authors to confirm and, if necessary, update their disclosure statements. On occasion, journals may ask authors to disclose further information about reported relationships.

### Section 6. Disclosure Statement

Based on the above disclosures, this form will automatically generate a disclosure statement, which will appear in the box below.

Dr. Ott has nothing to disclose.

### Evaluation and Feedback

Please visit <http://www.icmje.org/cgi-bin/feedback> to provide feedback on your experience with completing this form.

## ICMJE Form for Disclosure of Potential Conflicts of Interest

### Instructions

The purpose of this form is to provide readers of your manuscript with information about your other interests that could influence how they receive and understand your work. The form is designed to be completed electronically and stored electronically. It contains programming that allows appropriate data display. Each author should submit a separate form and is responsible for the accuracy and completeness of the submitted information. The form is in six parts.

#### 1. Identifying information.

#### 2. The work under consideration for publication.

This section asks for information about the work that you have submitted for publication. The time frame for this reporting is that of the work itself, from the initial conception and planning to the present. The requested information is about resources that you received, either directly or indirectly (via your institution), to enable you to complete the work. Checking "No" means that you did the work without receiving any financial support from any third party – that is, the work was supported by funds from the same institution that pays your salary and that institution did not receive third-party funds with which to pay you. If you or your institution received funds from a third party to support the work, such as a government granting agency, charitable foundation or commercial sponsor, check "Yes".

#### 3. Relevant financial activities outside the submitted work.

This section asks about your financial relationships with entities in the bio-medical arena that could be perceived to influence, or that give the appearance of potentially influencing, what you wrote in the submitted work. You should disclose interactions with ANY entity that could be considered broadly relevant to the work. For example, if your article is about testing an epidermal growth factor receptor (EGFR) antagonist in lung cancer, you should report all associations with entities pursuing diagnostic or therapeutic strategies in cancer in general, not just in the area of EGFR or lung cancer.

Report all sources of revenue paid (or promised to be paid) directly to you or your institution on your behalf over the 36 months prior to submission of the work. This should include all monies from sources with relevance to the submitted work, not just monies from the entity that sponsored the research. Please note that your interactions with the work's sponsor that are outside the submitted work should also be listed here. If there is any question, it is usually better to disclose a relationship than not to do so.

For grants you have received for work outside the submitted work, you should disclose support ONLY from entities that could be perceived to be affected financially by the published work, such as drug companies, or foundations supported by entities that could be perceived to have a financial stake in the outcome. Public funding sources, such as government agencies, charitable foundations or academic institutions, need not be disclosed. For example, if a government agency sponsored a study in which you have been involved and drugs were provided by a pharmaceutical company, you need only list the pharmaceutical company.

#### 4. Intellectual Property.

This section asks about patents and copyrights, whether pending, issued, licensed and/or receiving royalties.

#### 5. Relationships not covered above.

Use this section to report other relationships or activities that readers could perceive to have influenced, or that give the appearance of potentially influencing, what you wrote in the submitted work.

### Definitions.

**Entity:** government agency, foundation, commercial sponsor, academic institution, etc.

**Grant:** A grant from an entity, generally [but not always] paid to your organization

**Personal Fees:** Monies paid to you for services rendered, generally honoraria, royalties, or fees for consulting, lectures, speakers bureaus, expert testimony, employment, or other affiliations

**Non-Financial Support:** Examples include drugs/equipment supplied by the entity, travel paid by the entity, writing assistance, administrative support, etc.

**Other:** Anything not covered under the previous three boxes

**Pending:** The patent has been filed but not issued

**Issued:** The patent has been issued by the agency

**Licensed:** The patent has been licensed to an entity, whether earning royalties or not

**Royalties:** Funds are coming in to you or your institution due to your patent

## ICMJE Form for Disclosure of Potential Conflicts of Interest

### Section 1. Identifying Information

1. Given Name (First Name) IMANINA 2. Surname (Last Name) OLANINA 3. Date \_\_\_\_\_
4. Are you the corresponding author?  Yes  No
5. Manuscript Title 15PP 22 PROTEAS ...
6. Manuscript Identifying Number (if you know it) \_\_\_\_\_

### Section 2. The Work Under Consideration for Publication

Did you or your institution at any time receive payment or services from a third party (government, commercial, private foundation, etc.) for any aspect of the submitted work (including but not limited to grants, data monitoring board, study design, manuscript preparation, statistical analysis, etc.)?

Are there any relevant conflicts of interest?  Yes  No

### Section 3. Relevant financial activities outside the submitted work.

Place a check in the appropriate boxes in the table to indicate whether you have financial relationships (regardless of amount of compensation) with entities as described in the instructions. Use one line for each entity; add as many lines as you need by clicking the "Add +" box. You should report relationships that were present during the 36 months prior to publication.

Are there any relevant conflicts of interest?  Yes  No

### Section 4. Intellectual Property -- Patents & Copyrights

Do you have any patents, whether planned, pending or issued, broadly relevant to the work?  Yes  No

## ICMJE Form for Disclosure of Potential Conflicts of Interest

### Section 5. Relationships not covered above

Are there other relationships or activities that readers could perceive to have influenced, or that give the appearance of potentially influencing, what you wrote in the submitted work?

- Yes, the following relationships/conditions/circumstances are present (explain below):
- No other relationships/conditions/circumstances that present a potential conflict of interest

At the time of manuscript acceptance, journals will ask authors to confirm and, if necessary, update their disclosure statements. On occasion, journals may ask authors to disclose further information about reported relationships.

### Section 6. Disclosure Statement

Based on the above disclosures, this form will automatically generate a disclosure statement, which will appear in the box below.

✓ CONFLICT OF INTEREST

### Evaluation and Feedback

Please visit <http://www.icmje.org/cgi-bin/feedback> to provide feedback on your experience with completing this form.

## ICMJE Form for Disclosure of Potential Conflicts of Interest

### Instructions

The purpose of this form is to provide readers of your manuscript with information about your other interests that could influence how they receive and understand your work. The form is designed to be completed electronically and stored electronically. It contains programming that allows appropriate data display. Each author should submit a separate form and is responsible for the accuracy and completeness of the submitted information. The form is in six parts.

#### 1. Identifying information.

#### 2. The work under consideration for publication.

This section asks for information about the work that you have submitted for publication. The time frame for this reporting is that of the work itself, from the initial conception and planning to the present. The requested information is about resources that you received, either directly or indirectly (via your institution), to enable you to complete the work. Checking "No" means that you did the work without receiving any financial support from any third party -- that is, the work was supported by funds from the same institution that pays your salary and that institution did not receive third-party funds with which to pay you. If you or your institution received funds from a third party to support the work, such as a government granting agency, charitable foundation or commercial sponsor, check "Yes".

#### 3. Relevant financial activities outside the submitted work.

This section asks about your financial relationships with entities in the bio-medical arena that could be perceived to influence, or that give the appearance of potentially influencing, what you wrote in the submitted work. You should disclose interactions with ANY entity that could be considered broadly relevant to the work. For example, if your article is about testing an epidermal growth factor receptor (EGFR) antagonist in lung cancer, you should report all associations with entities pursuing diagnostic or therapeutic strategies in cancer in general, not just in the area of EGFR or lung cancer.

Report all sources of revenue paid (or promised to be paid) directly to you or your institution on your behalf over the 36 months prior to submission of the work. This should include all monies from sources with relevance to the submitted work, not just monies from the entity that sponsored the research. Please note that your interactions with the work's sponsor that are outside the submitted work should also be listed here. If there is any question, it is usually better to disclose a relationship than not to do so.

For grants you have received for work outside the submitted work, you should disclose support ONLY from entities that could be perceived to be affected financially by the published work, such as drug companies, or foundations supported by entities that could be perceived to have a financial stake in the outcome. Public funding sources, such as government agencies, charitable foundations or academic institutions, need not be disclosed. For example, if a government agency sponsored a study in which you have been involved and drugs were provided by a pharmaceutical company, you need only list the pharmaceutical company.

#### 4. Intellectual Property.

This section asks about patents and copyrights, whether pending, issued, licensed and/or receiving royalties.

#### 5. Relationships not covered above.

Use this section to report other relationships or activities that readers could perceive to have influenced, or that give the appearance of potentially influencing, what you wrote in the submitted work.

#### Definitions.

**Entity:** government agency, foundation, commercial sponsor, academic institution, etc.

**Grant:** A grant from an entity, generally [but not always] paid to your organization

**Personal Fees:** Monies paid to you for services rendered, generally honoraria, royalties, or fees for consulting, lectures, speakers bureaus, expert testimony, employment, or other affiliations

**Non-Financial Support:** Examples include drugs/equipment supplied by the entity, travel paid by the entity, writing assistance, administrative support, etc.

**Other:** Anything not covered under the previous three boxes

**Pending:** The patent has been filed but not issued

**Issued:** The patent has been issued by the agency

**Licensed:** The patent has been licensed to an entity, whether earning royalties or not

**Royalties:** Funds are coming in to you or your institution due to your patent

## ICMJE Form for Disclosure of Potential Conflicts of Interest

### Section 1. Identifying Information

|                                                                                                                                     |                                                                     |                                             |
|-------------------------------------------------------------------------------------------------------------------------------------|---------------------------------------------------------------------|---------------------------------------------|
| 1. Given Name (First Name)<br>xiaoji                                                                                                | 2. Surname (Last Name)<br>zhang                                     | 3. Date<br>18-December-2017                 |
| 4. Are you the corresponding author?                                                                                                | <input type="checkbox"/> Yes <input checked="" type="checkbox"/> No | Corresponding Author's Name<br>Pavel Strnad |
| 5. Manuscript Title<br>Hsp72 protects from liver injury via attenuation of hepatocellular death, oxidative stress and JNK-signaling |                                                                     |                                             |
| 6. Manuscript Identifying Number (if you know it)<br>_____                                                                          |                                                                     |                                             |

### Section 2. The Work Under Consideration for Publication

Did you or your institution **at any time** receive payment or services from a third party (government, commercial, private foundation, etc.) for any aspect of the submitted work (including but not limited to grants, data monitoring board, study design, manuscript preparation, statistical analysis, etc.)?

Are there any relevant conflicts of interest?  Yes  No

### Section 3. Relevant financial activities outside the submitted work.

Place a check in the appropriate boxes in the table to indicate whether you have financial relationships (regardless of amount of compensation) with entities as described in the instructions. Use one line for each entity; add as many lines as you need by clicking the "Add +" box. You should report relationships that were **present during the 36 months prior to publication**.

Are there any relevant conflicts of interest?  Yes  No

### Section 4. Intellectual Property -- Patents & Copyrights

Do you have any patents, whether planned, pending or issued, broadly relevant to the work?  Yes  No

## ICMJE Form for Disclosure of Potential Conflicts of Interest

---

### Section 5. Relationships not covered above

Are there other relationships or activities that readers could perceive to have influenced, or that give the appearance of potentially influencing, what you wrote in the submitted work?

- Yes, the following relationships/conditions/circumstances are present (explain below):
- No other relationships/conditions/circumstances that present a potential conflict of interest

At the time of manuscript acceptance, journals will ask authors to confirm and, if necessary, update their disclosure statements. On occasion, journals may ask authors to disclose further information about reported relationships.

### Section 6. Disclosure Statement

Based on the above disclosures, this form will automatically generate a disclosure statement, which will appear in the box below.

Dr. zhang has nothing to disclose.

### Evaluation and Feedback

Please visit <http://www.icmje.org/cgi-bin/feedback> to provide feedback on your experience with completing this form.

## ICMJE Form for Disclosure of Potential Conflicts of Interest

### Instructions

The purpose of this form is to provide readers of your manuscript with information about your other interests that could influence how they receive and understand your work. The form is designed to be completed electronically and stored electronically. It contains programming that allows appropriate data display. Each author should submit a separate form and is responsible for the accuracy and completeness of the submitted information. The form is in six parts.

#### 1. Identifying information.

#### 2. The work under consideration for publication.

This section asks for information about the work that you have submitted for publication. The time frame for this reporting is that of the work itself, from the initial conception and planning to the present. The requested information is about resources that you received, either directly or indirectly (via your institution), to enable you to complete the work. Checking "No" means that you did the work without receiving any financial support from any third party -- that is, the work was supported by funds from the same institution that pays your salary and that institution did not receive third-party funds with which to pay you. If you or your institution received funds from a third party to support the work, such as a government granting agency, charitable foundation or commercial sponsor, check "Yes".

#### 3. Relevant financial activities outside the submitted work.

This section asks about your financial relationships with entities in the bio-medical arena that could be perceived to influence, or that give the appearance of potentially influencing, what you wrote in the submitted work. You should disclose interactions with ANY entity that could be considered broadly relevant to the work. For example, if your article is about testing an epidermal growth factor receptor (EGFR) antagonist in lung cancer, you should report all associations with entities pursuing diagnostic or therapeutic strategies in cancer in general, not just in the area of EGFR or lung cancer.

Report all sources of revenue paid (or promised to be paid) directly to you or your institution on your behalf over the 36 months prior to submission of the work. This should include all monies from sources with relevance to the submitted work, not just monies from the entity that sponsored the research. Please note that your interactions with the work's sponsor that are outside the submitted work should also be listed here. If there is any question, it is usually better to disclose a relationship than not to do so.

For grants you have received for work outside the submitted work, you should disclose support ONLY from entities that could be perceived to be affected financially by the published work, such as drug companies, or foundations supported by entities that could be perceived to have a financial stake in the outcome. Public funding sources, such as government agencies, charitable foundations or academic institutions, need not be disclosed. For example, if a government agency sponsored a study in which you have been involved and drugs were provided by a pharmaceutical company, you need only list the pharmaceutical company.

#### 4. Intellectual Property.

This section asks about patents and copyrights, whether pending, issued, licensed and/or receiving royalties.

#### 5. Relationships not covered above.

Use this section to report other relationships or activities that readers could perceive to have influenced, or that give the appearance of potentially influencing, what you wrote in the submitted work.

#### Definitions.

**Entity:** government agency, foundation, commercial sponsor, academic institution, etc.

**Grant:** A grant from an entity, generally [but not always] paid to your organization

**Personal Fees:** Monies paid to you for services rendered, generally honoraria, royalties, or fees for consulting, lectures, speakers bureaus, expert testimony, employment, or other affiliations

**Non-Financial Support:** Examples include drugs/equipment supplied by the entity, travel paid by the entity, writing assistance, administrative support, etc.

**Other:** Anything not covered under the previous three boxes

**Pending:** The patent has been filed but not issued

**Issued:** The patent has been issued by the agency

**Licensed:** The patent has been licensed to an entity, whether earning royalties or not

**Royalties:** Funds are coming in to you or your institution due to your patent



## ICMJE Form for Disclosure of Potential Conflicts of Interest

### Section 1. Identifying Information

1. Given Name (First Name)

marianne

2. Surname (Last Name)

ziol

3. Date

14-December-2017

4. Are you the corresponding author?

Yes

No

Corresponding Author's Name

Nurdan Güldiken

5. Manuscript Title

Hsp72 protects from liver injury via attenuation of hepatocellular death, oxidative stress and JNK-signaling

6. Manuscript Identifying Number (if you know it)

### Section 2. The Work Under Consideration for Publication

Did you or your institution **at any time** receive payment or services from a third party (government, commercial, private foundation, etc.) for any aspect of the submitted work (including but not limited to grants, data monitoring board, study design, manuscript preparation, statistical analysis, etc.)?

Are there any relevant conflicts of interest?

Yes

No

### Section 3. Relevant financial activities outside the submitted work.

Place a check in the appropriate boxes in the table to indicate whether you have financial relationships (regardless of amount of compensation) with entities as described in the instructions. Use one line for each entity; add as many lines as you need by clicking the "Add +" box. You should report relationships that were **present during the 36 months prior to publication**.

Are there any relevant conflicts of interest?

Yes

No

### Section 4. Intellectual Property -- Patents & Copyrights

Do you have any patents, whether planned, pending or issued, broadly relevant to the work?

Yes

No

## ICMJE Form for Disclosure of Potential Conflicts of Interest

---

### Section 5. Relationships not covered above

Are there other relationships or activities that readers could perceive to have influenced, or that give the appearance of potentially influencing, what you wrote in the submitted work?

- Yes, the following relationships/conditions/circumstances are present (explain below):
- No other relationships/conditions/circumstances that present a potential conflict of interest

At the time of manuscript acceptance, journals will ask authors to confirm and, if necessary, update their disclosure statements. On occasion, journals may ask authors to disclose further information about reported relationships.

### Section 6. Disclosure Statement

Based on the above disclosures, this form will automatically generate a disclosure statement, which will appear in the box below.

Dr. ziol has nothing to disclose.

### Evaluation and Feedback

Please visit <http://www.icmje.org/cgi-bin/feedback> to provide feedback on your experience with completing this form.

# Hsp72 protects from liver injury via attenuation of hepatocellular death, oxidative stress and JNK-signaling

Kateryna Levada, Nurdan Guldiken, Xiaoji Zhang, Giovanna Vella, Fa-Rong Mo, Laura P. James, Johannes Haybaeck, Sonja M. Kessler, Alexandra K. Kiemer, Thomas Ott, Daniel Hartmann, Norbert Hüser, Marianne Ziol, Christian Trautwein, Pavel Strnad

## Table of contents

|                                           |    |
|-------------------------------------------|----|
| Supplementary Materials and Methods ..... | 3  |
| Fig.S1 .....                              | 8  |
| Fig. S2 .....                             | 9  |
| Fig. S3 .....                             | 10 |
| Fig. S4 .....                             | 11 |
| Fig. S5 .....                             | 12 |
| Fig. S6 .....                             | 13 |
| Fig. S7 .....                             | 14 |
| Fig. S8 .....                             | 15 |
| Fig. S9 .....                             | 16 |
| Fig. S10 .....                            | 17 |
| Fig. S11 .....                            | 18 |
| Fig. S12 .....                            | 19 |
| Fig. S13 .....                            | 20 |
| Fig. S14 .....                            | 21 |
| Table S1 .....                            | 22 |
| Table S2 .....                            | 23 |

|                  |    |
|------------------|----|
| Table S3 .....   | 25 |
| Table S4 .....   | 27 |
| References ..... | 29 |

## Supplementary Materials and Methods

**Animal experiments.** For this study we used hemizygous single transgenic Lap-tTA, the newly generated Hsp72 or non-transgenic and double transgenic (i.e. containing both Lap-tTA and Hsp72) Hsp72 overexpressing mice on C57BL/6 background. Animals were housed in plastic cages and kept at a room temperature (22°C) in Animal Facility of the Ulm University (Ulm, Germany) or University Hospital in Aachen (Aachen, Germany). Both water and chow were given ad libitum. The breeding room was kept at a 12 hour day-night cycle. All treatments have been made in accordance with the German guidelines for animal research and animal welfare. For all experiments, the blood and tissue samples were collected from double transgenic mice (males) and their non-transgenic littermates.

**Cell Culture Experiments.** The analyzed cell populations were isolated from 2-4-month-old double transgenic mice (males and females) and their age- and sex-matched non-transgenic littermates. The isolation procedure was carried out by a specialized core facility available at the University Hospital Aachen using previously described protocols [S1]. After the isolation, cells were either stored in RNAlater (Qiagen) or immediately used for RNA preparation. Alternatively, primary hepatocytes were cultured in the HepatoZYME-SFM medium (Invitrogen, Karlsruhe, Germany) supplemented with 1% penicillin-streptomycin and L-Glutamine (Invitrogen). The cells were grown at commercially available, 60-mm collagen-coated culture dishes (BD Falcon Biocoat collagen 6-well plates) in a humidified incubator at 37°C and 5% CO<sub>2</sub>.

To induce lipotoxic injury, hepatocytes were treated with 0.5mM palmitic acid (PA, Sigma, Munich, Germany) for 24 hours. To optimize the uptake into the hepatocytes, PA was conjugated to bovine serum albumin (BSA, Sigma) prior to the experiment as described earlier [S2]. Control solution was prepared in the same way but without addition of PA. After the treatment, the levels of alanine aminotransferase (ALT) and lactate dehydrogenase (LDH) in the cell culture supernatant were measured by the Clinical Chemistry Department of the University Hospital Aachen.

To evaluate the impact of inflammatory cytokines on Hsp72 expression, mouse primary hepatocytes isolated from non-transgenic animals were treated for 6 hours with interleukin 6 (IL-6; 40 ng/ml) or interleukin 1-β (IL1-β; 20 ng/ml; all from Sigma) as described [S3]. Alternatively, the cells were treated for 6 hours with the STAT3 inducer colivelin (0,01 μM; R&D systems). Cells exposed to carrier only were used as controls.

**Reverse transcription and qRT-PCR analysis.** Total RNA was isolated from liver tissue samples and the isolated cells with the help of RNeasy Mini Kit (Qiagen) according to the manual. For bile ducts, a micro kit from Ambion was employed (Karlsruhe, Germany). Translation of RNA into cDNA was performed with M-MLV-Reverse-Transcriptase Kit (Promega) using oligo-dT primers. Quantitative real time PCR (qRT-PCR) was done with the 7300 Fast Real Time PCR system (Applied Biosystems, Foster City, CA) using specific primers (Supplementary Table 2). Mouse ribosomal protein (L7) and human Large Ribosomal Protein (RPLPO) were analysed as internal controls. The data were evaluated with 7300 Sequence Detection Software (Applied Biosystems).

**Protein biochemistry.** Total liver tissue lysates were prepared by a homogenization in a buffer containing 3% sodium dodecyl sulphate (SDS, Roth, Karlsruhe, Germany). Alternatively, protein extracts enriched in Triton X-insoluble proteins were obtained via high salt extraction [S4]. To determine the exact localization of Hsp72, subcellular fractionation was performed as described [S5]. The samples were diluted with 4x reducing Laemmli buffer and the proteins were separated via 8-10% SDS–polyacrylamide gel electrophoresis. To check for equal loading, proteins were visualized with 0.05% Coomassie Brilliant Blue staining. For immunoblotting, samples were transferred to PVDF membranes and incubated with the appropriate primary and secondary antibodies (see Supplementary Table 3). To detect the amount of Hsp72 in mouse serum, dot-blotting was performed as previously described [S3]. The amount of bound horseradish peroxidase that is conjugated to the secondary antibody was determined after incubation with an ECL Detection kit (GE Healthcare Europe GmbH, Freiburg, Germany).

**Tissue stainings.** For histological/immunohistochemical stainings, liver samples were placed overnight into 10% buffered formalin, dehydrated, embedded in paraffin and cut onto 2µm thick sections. Subsequently, hematoxylin and eosin (H&E) staining was performed or unstained sections were used for immunohistochemistry. For the latter, antigen retrieval was accomplished by boiling samples in ethylene diamine tetraacetic acid (EDTA) buffer (1 mM, pH=8) or in Antigen Unmasking Solution, Citric Acid Based (Vector Laboratories; Burlingame, CA) for 30 min. The unmasking step was followed by washing with 1x phosphate saline buffer (PBS). After that, slides were exposed overnight at +4°C with HSP72 (1:100 dilution), Grp78 (1:50) or Hsp27 (1:50). The excess primary antibodies were removed via washing with 1xPBS and incubated with a biotin-conjugated secondary

antibody (Supplementary Table 3). The specific signal was further amplified with the help of a AB reagent that couples the biotinylated antibody with a peroxidase (Vector Laboratories; Burlingame, CA). Finally, vector Nova Red (Vector Laboratories) was used as a peroxidase substrate. At the end, slides were washed with running tap water, dehydrated and mounted with Entellan (Merck, Germany).

For immunofluorescence (IF), TUNEL, DHE (Dihydroethidium) or Oil Red O (ORO) staining, livers samples were embedded in Tissue-Tek Compound (Sakura), snap frozen, cut onto 2µm thin sections and fixed with pre-cooled 100% acetone. Alternatively, primary mouse hepatocyte grown on slides covered with Poly-D-Lysine (BD, Heidelberg, Germany) were washed with 1xPBS and fixed in 10% Formalin.

ORO staining was used for visualization of lipid droplets. Briefly, samples were washed with running tap water and rinsed with 60% isopropanol (Sigma). Afterwards the slides were stained with Oil Red O diluted in methanol for 15 min at RT. Subsequently, the excess, unbound dye was removed with 60% isopropanol. Counterstaining of nuclei and other basophilic structures was done with haematoxylin (1:1 diluted with water, Roth). Finally, slides were rinsed with distilled water and mounted with aqueous Kaiser's glycerol gelatine (Merck, Germany). The extent of cell death within the slides was determined by a commercially available TUNEL assay kit (Roche Diagnostics, Penzberg, Germany) as specified in the manufacturer's protocol. The detection of superoxide was accomplished via DHE staining using a commercially available kit (ThermoFisher, Karlsruhe, Germany) and following the manufacturer's protocol.

Double IF staining was performed with following primary antibodies: K8/K18 (8592; [S4] and p62-Seq1 (GP62-C, Progen, Heidelberg, Germany; both diluted 1:500). Slides were exposed overnight with primary antibodies, followed by three washing steps with 1xPBS and incubation with appropriate Alexa-conjugated secondary antibodies for 30 minutes (Invitrogen).

At the end, slides were washed and mounted with ProLong Gold mounting medium containing DAPI (Invitrogen) to visualize the nuclei. Images were acquired with an Axio Imager.Z1 (Zeiss; Jena; Germany) microscope equipped with a digital camera and AxioVision Rel. 4.8 software (Zeiss).

**Luciferase assays.** To analyze the luciferase activity *in vivo*, mice were anesthetized with isoflurane and injected intraperitoneally with 200 µl of D-Luciferin solution (PerkinElmer,

Hamburg, Germany). Bioluminescence was measured by IVIS LUMINA XR system (Caliper, Hopkinton, MA). Luciferase activity *in vitro* was analyzed using the Lumat LB 9501 Luminometer (Berthold Technologies, Bad Wildbad, Germany) and the Luciferase assay kit (Promega, Mannheim, Germany) according to the manufacturer's instructions.

**Biochemical assays.** The amount of total (GSH) and oxidized (GSSG) glutathione in liver tissue was measured with a spectrophotometric assay according to the manufacturer's instructions (#703002, Cayman Chemical, Ann Arbor, MI).

The quantification of APAP protein adducts was performed in the lab of Prof. Laura James. After enzymatic digestion of the tissues, adducts were assessed through high pressure liquid chromatography with electrochemical detection (HPLC-EC) and normalized to protein concentration [S6, S7].

To quantify protoporphyrin IX levels, liver tissue was homogenized with 0.9 N perchloric acid/ethanol solution and the samples were centrifuged at 14000 rpm for 30 min. Protoporphyrin IX levels were determined in the supernatant based on their fluorescence (400 nm excitation and 590 nm emission) and the levels were normalized to liver tissue weight. Standard curve was generated with the help of commercially available PPIX standard (Sigma).

For caspase 3 activity assay, liver tissue was homogenized in a detergent-free lysis buffer (100 $\mu$ l 1M Hepes, pH=7.4; 100 $\mu$ l 10%CHAPS; 40 $\mu$ l 0.5M EDTA, pH=8; 50 $\mu$ l 1M DTT; 100 $\mu$ l 0.1M protease inhibitor; distilled water till 10 ml) and the samples were centrifuged at 12000 rpm at +4°C for 10 min. Supernatant was collected and mixed with a commercially available master mix (Biomol, Hamburg Germany). After the incubation step, the resulting absorbance was determined photometrically (excitation wavelength: 390 nm, emission wavelength: 510 nm).

**Determination of parameters of lipid metabolism.** A commercially available colorimetric assay (#700190, Cayman) was used to quantify the amount of  $\beta$ -hydroxybutyrate in the serum. The analysis was performed according to manufacturer's recommendations. The total amount of triglycerides, free fatty acids, ceramides, phosphatidylcholine and phosphatidylethanolamine in the liver was quantified via thin-layer chromatography (TLC) method, whereas fatty acid profile was revealed by gas chromatography-mass spectrometry (GC-MS). Both methods have been described in detail as previously [S8-S11].



**Statistical analysis.** Statistical analysis was carried out with GraphPad Prism 5. Normality of distribution was tested with the Kolmogorov-Smirnoff-test. Based on the results, the data are shown as mean  $\pm$  standard error of the mean (SEM) or medians with first and third quartiles. Two-tailed Student's t-test and the non-parametrical Mann-Whitney U-test were used for samples with and without normal distribution, respectively. A p-value  $< 0.05$  was considered statistically significant.

Supplementary Figures

**A** HCV inflammation grade

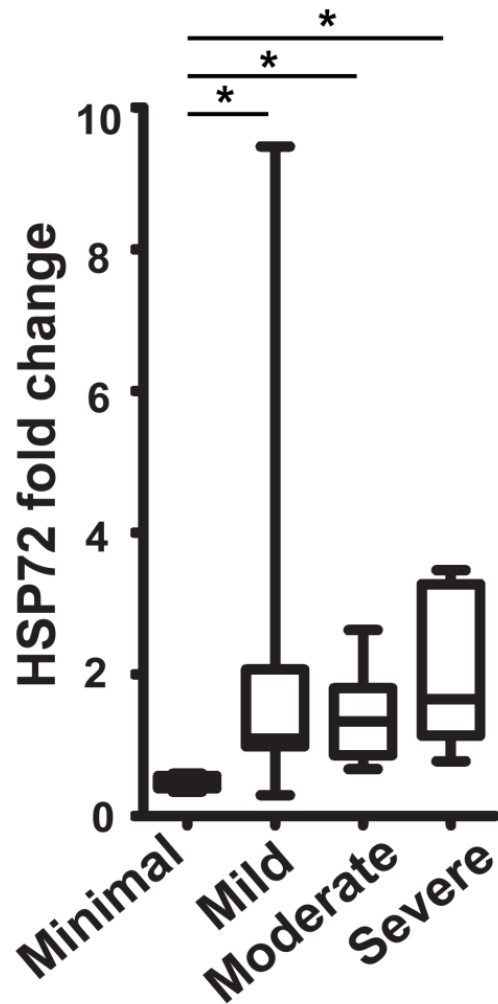

**B** NASH inflammation grade

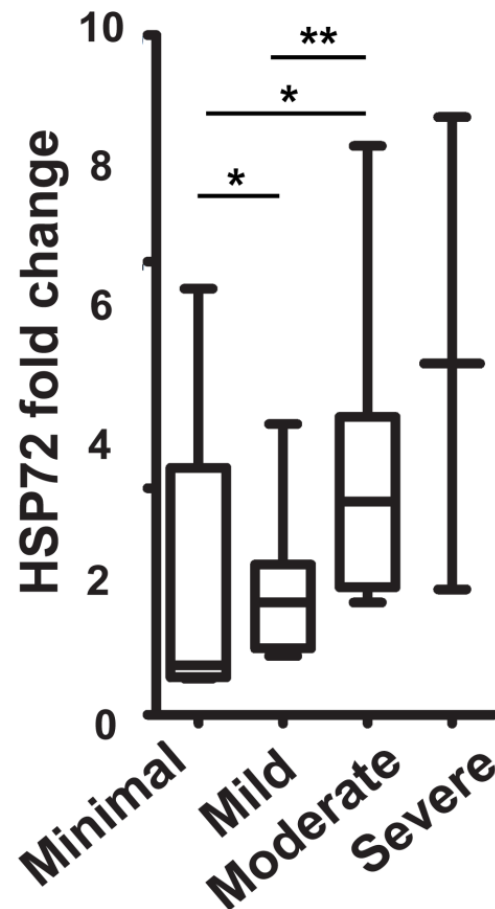

**Fig. S1. Hsp72 expression correlates with the extent of hepatic inflammation.** HSP72 mRNA levels were determined in patients with chronic hepatitis C infection (HCV; A) and non-alcoholic steatohepatitis (NASH; B) and the expression among patients with different inflammation grades was compared. Boxplots display medians with first and third quartiles, while whiskers indicate smallest and largest non-outlier observations. RPLPO (large ribosomal protein) gene was used as an internal control. Non-parametrical Mann-Whitney U-test was used for statistical evaluation. Asterisk and double asterisk highlight  $p < 0.01$  and  $p < 0.001$ , respectively.

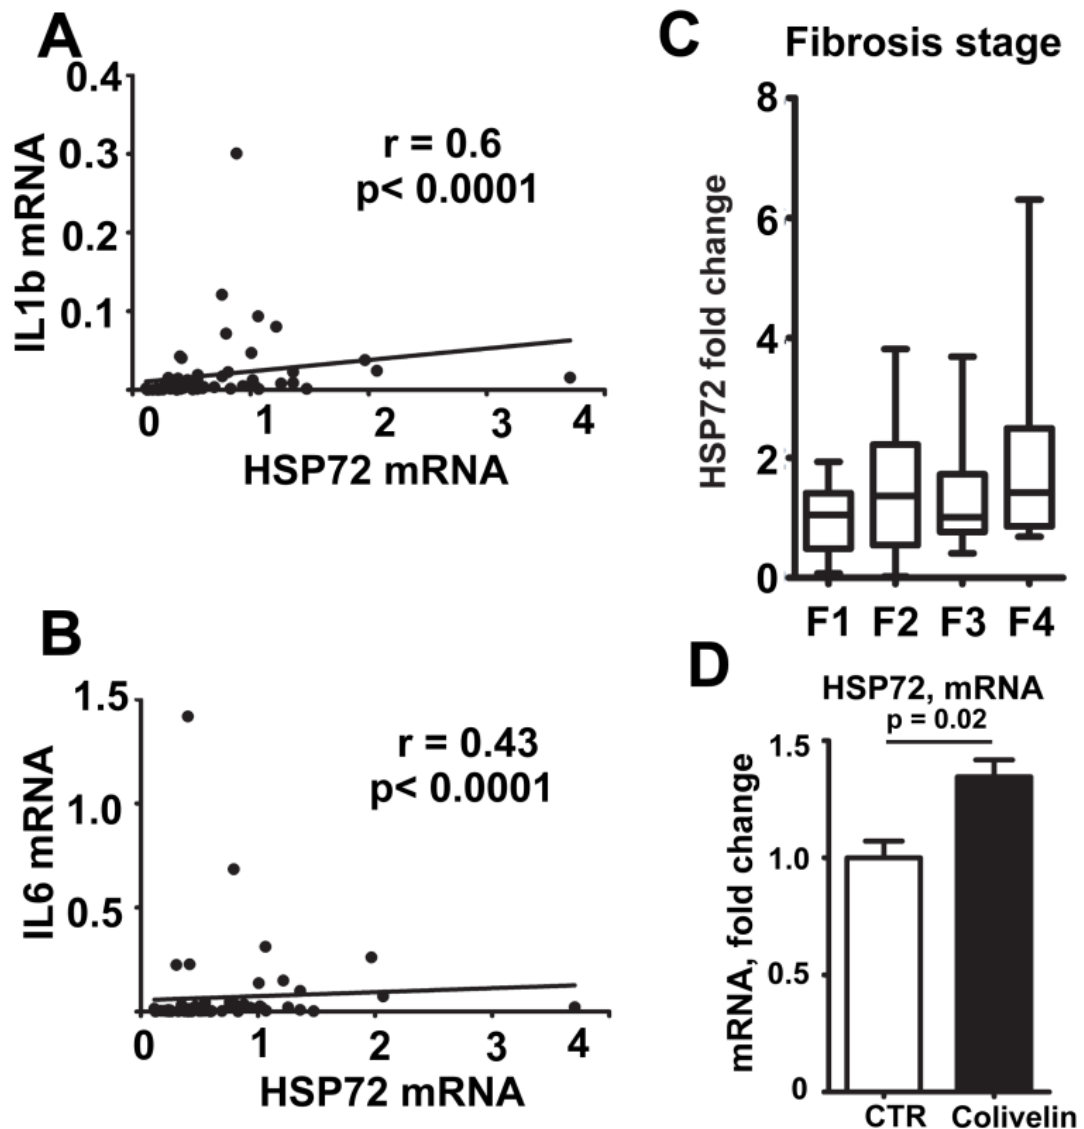

**Fig. S2. Hsp72 expression correlates with the levels of inflammatory cytokines.** (A,B) Hepatic mRNA levels of HSP72, interleukin 6 or interleukin 1 $\beta$  were determined in liver healthy subjects (CTR), patients with non-alcoholic steatohepatitis (NASH) and patients with chronic hepatitis C infection (HCV) and compared with the help of Spearman's correlation coefficient. (C) HSP72 mRNA levels were also compared in patients with different fibrosis stages. Boxplots display medians with first and third quartiles, while whiskers indicate smallest and largest non-outlier observations. RPLPO (large ribosomal protein) gene was used as an internal control. (D) HSP72 mRNA expression was analyzed in mouse primary hepatocytes, that were treated with carrier only (CTR) or subjected to colivelin. L7 (mouse ribosomal protein) was used as an internal control. Results are expressed as mean  $\pm$  SEM (n=4 for each group). The average expression in control cells was arbitrarily set as 1 and the expression in colivelin-treated cells represents a ratio. Two-tailed Student's t-test was used for statistical evaluation.

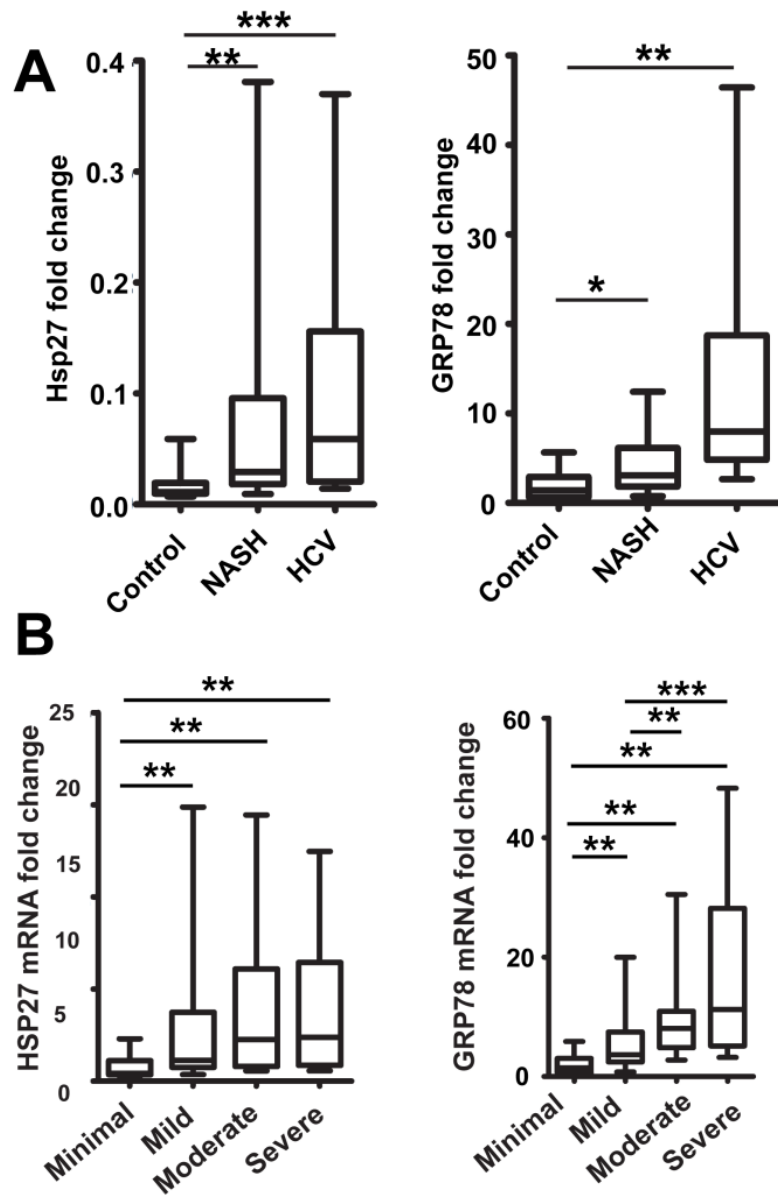

**Fig. S3. Expression of Hsp27 and GRP78 is increased in human liver disease and correlates with the level of hepatic inflammation.** (A) Hsp27 and GRP78 mRNA levels were determined in liver healthy subjects (Control), patients with non-alcoholic steatohepatitis (NASH) and patients with chronic hepatitis C infection (HCV). (B) mRNA levels of both heat shock proteins were also compared in patients with different inflammation grades. Human RPLPO (large ribosomal protein) gene was used as an internal control. Boxplots display medians with first and third quartiles, while whiskers indicate smallest and largest non-outlier observations. Non-parametrical Mann-Whitney U-test was used for statistical evaluation. Asterisk, double and triple asterisk highlight  $p < 0.01$ ,  $p < 0.001$  and  $p < 0.0001$  respectively.

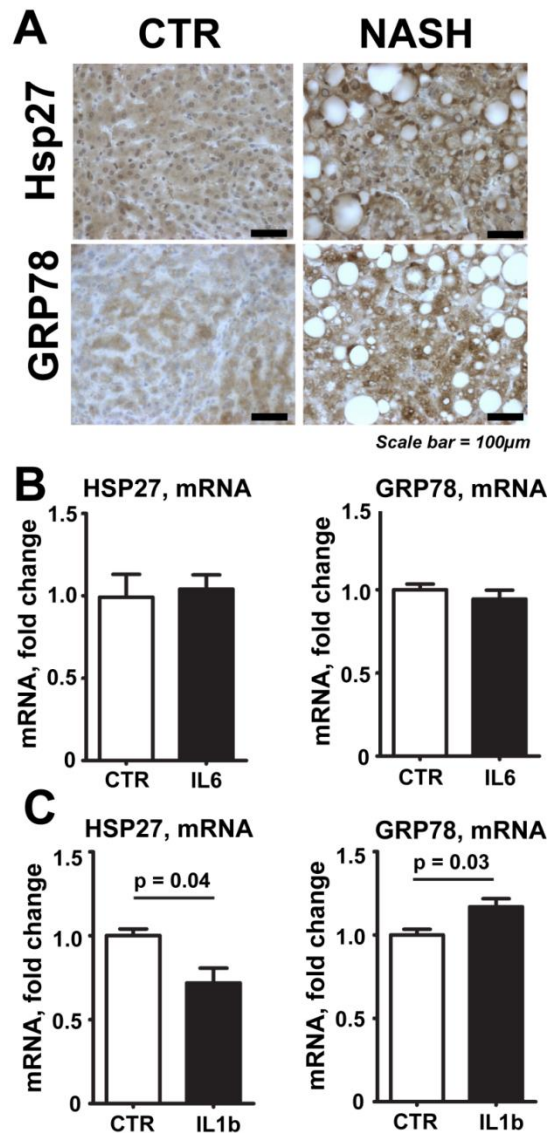

**Fig. S4. Hsp27 and GRP78 in patients with non-alcoholic steatohepatitis and in response to inflammatory cytokines.** (A) Hepatic Hsp27 and GRP78 distribution was assessed by immunohistochemistry in histologically inconspicuous livers (CTR) and in livers from patients with non-alcoholic steatohepatitis (NASH). Scale bar = 100 µm. (B,C) Hsp27 and GRP78 mRNA expression was analyzed in mouse primary hepatocytes, that were either treated with carrier only (CTR) or subjected to interleukin 6 (IL6; 40 ng/ml) or interleukin 1 $\beta$  (IL1; 20 ng/ml) for 6 hours. L7 (mouse ribosomal protein) was used as an internal control. Results are expressed as mean  $\pm$  SEM (n=4 for each group). The average expression in control cells was arbitrarily set as 1 and all other levels represent a ratio. Two-tailed Student's t-test was used for statistical evaluation.

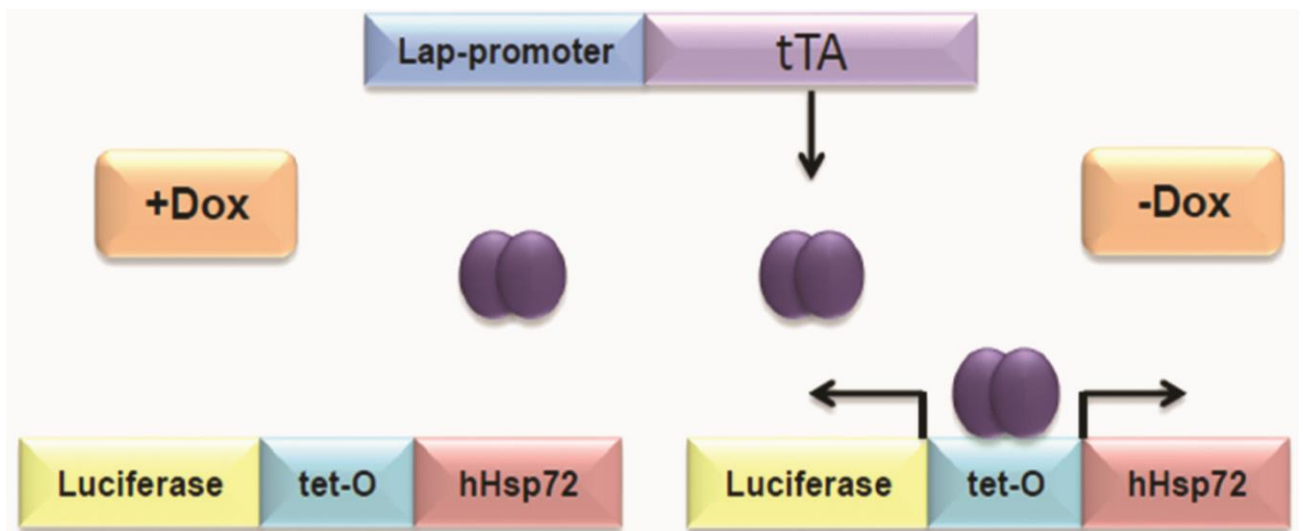

**Fig. S5. Generation of Hsp72 transgenic mouse.** To address the importance of Hsp72 in the liver, transgenic mice carrying a doxycycline-repressible HSP72 construct were generated. The employed vector contains a bidirectional tet-responsive promoter (tet-O) that allows simultaneous expression of human HSP72 (hHsp72; target gene) and firefly luciferase (reporter gene) in absence of doxycycline (Dox). To obtain liver-specific expression, transgenic Hsp72 overexpressing mice were crossbred with animals carrying tetracycline-responsive transactivator (tTA) under the control of the rat liver activator protein (Lap) promoter. In the absence (but not in the presence) of doxycycline, the produced tTA protein binds to a tet-O operator sequence which leads to the Hsp72/luciferase expression (tet-off system).

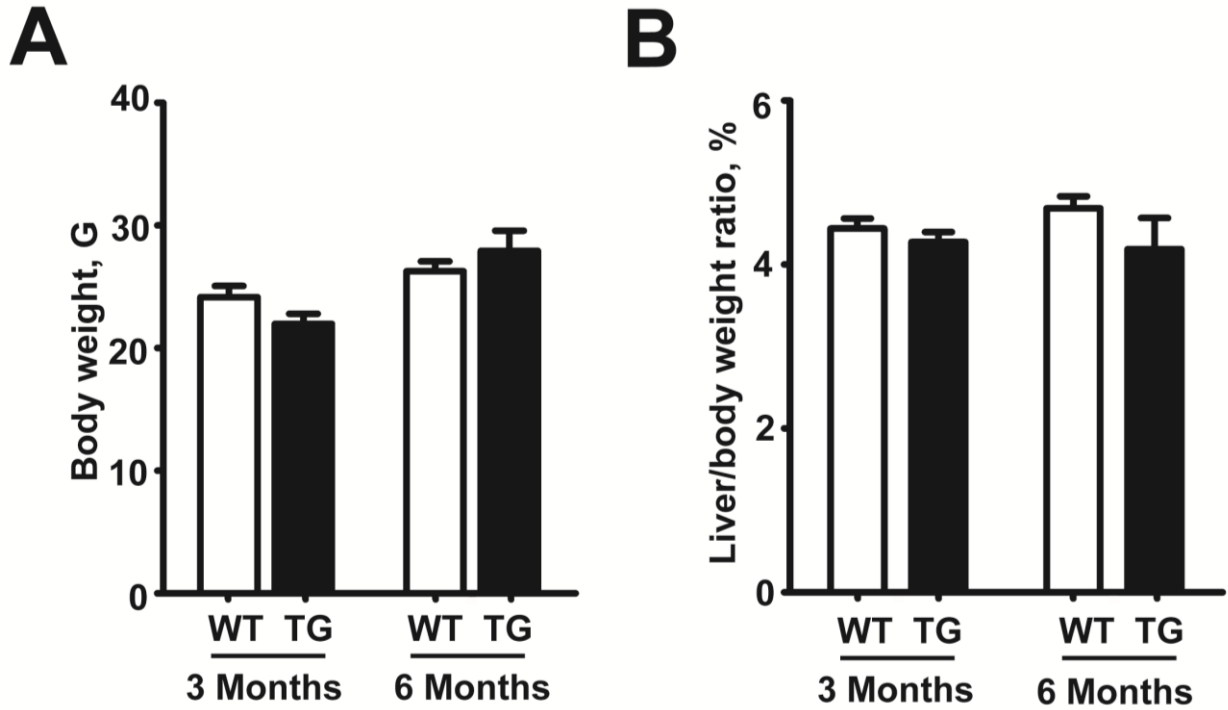

**Fig. S6. Hsp72 overexpressing mice display no significant changes in body weight and a normal liver/body weight ratio.** The body weight (A) of 3 or 6 months old, double transgenic (TG) and non-transgenic (WT) animals was measured. The ratio of liver to body weight (B) is shown as a percentage. Results are expressed as mean  $\pm$  SEM, at least 7 samples per group were used. Two-tailed Student's t-test was used for statistical evaluation.

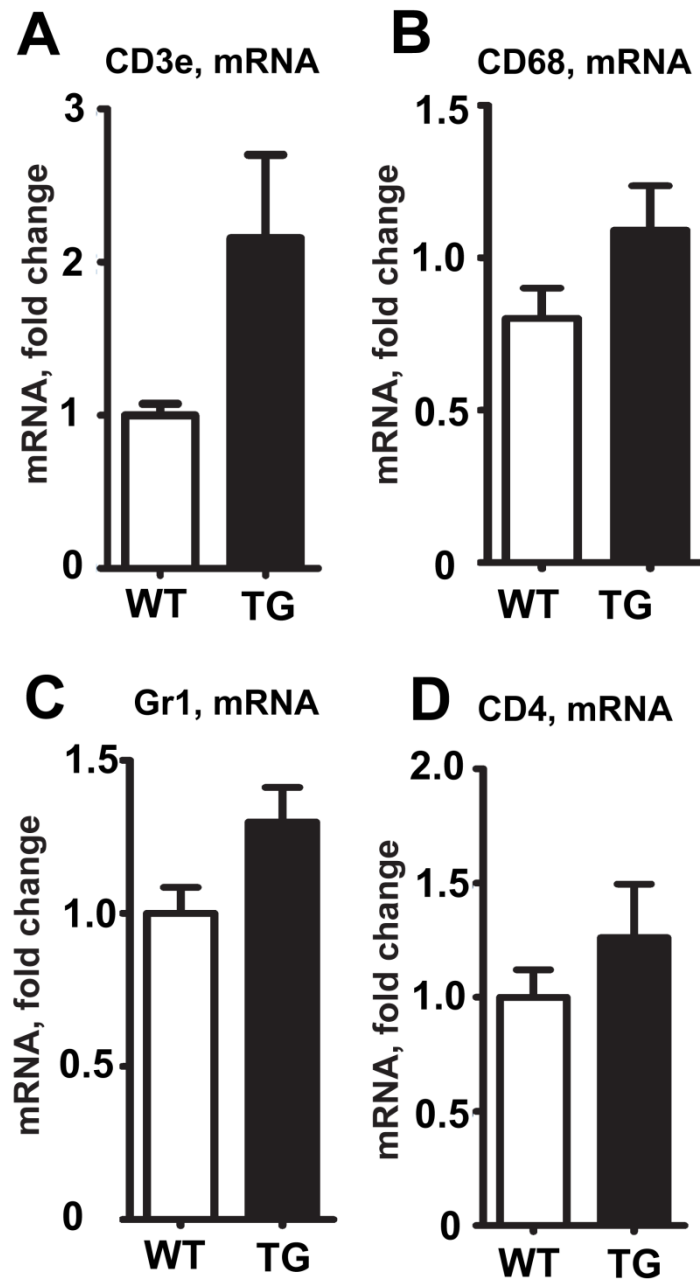

**Fig. S7. Hepatic expression of inflammation-related genes in untreated non-transgenic and Hsp72-overexpressing mice.** The hepatic mRNA production of the indicated inflammation-related genes was assessed in non-transgenic (WT) and double transgenic (TG) animals under basal conditions (n=5). L7 (mouse ribosomal protein) was used as an internal control and results are expressed as mean  $\pm$  SEM. Two-tailed Student's t-test was used for statistical evaluation.



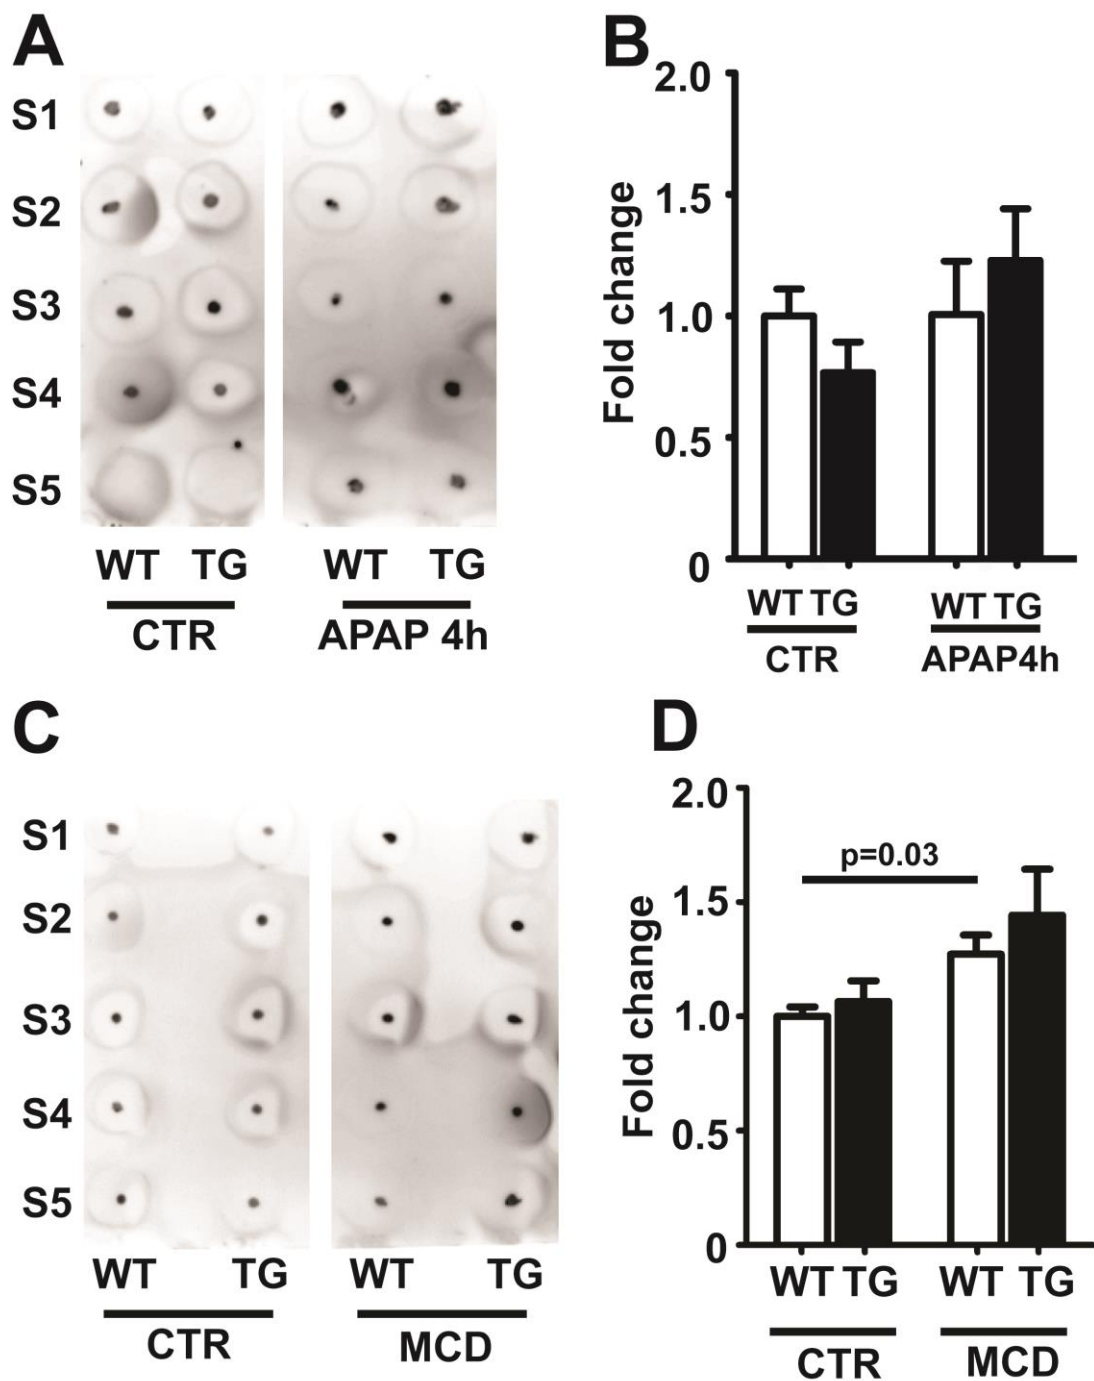

**Fig. S8. Serum Hsp72 levels in non-transgenic and Hsp72-overexpressing mice.** Sera from non-transgenic (WT) and double transgenic (TG) mice were assessed for its Hsp72 content via dot blots. The signal intensity in untreated mice (CTR), in mice exposed to acetaminophen for 4 hours (APAP 4h) and in animals subjected to methionine choline-deficient was quantified by ImageJ and the results are expressed as mean  $\pm$  SEM. The average levels in untreated, non-transgenic animals were arbitrarily set as 1 and all other levels represent a ratio. Two-tailed Student's t-test was used for statistical evaluation.

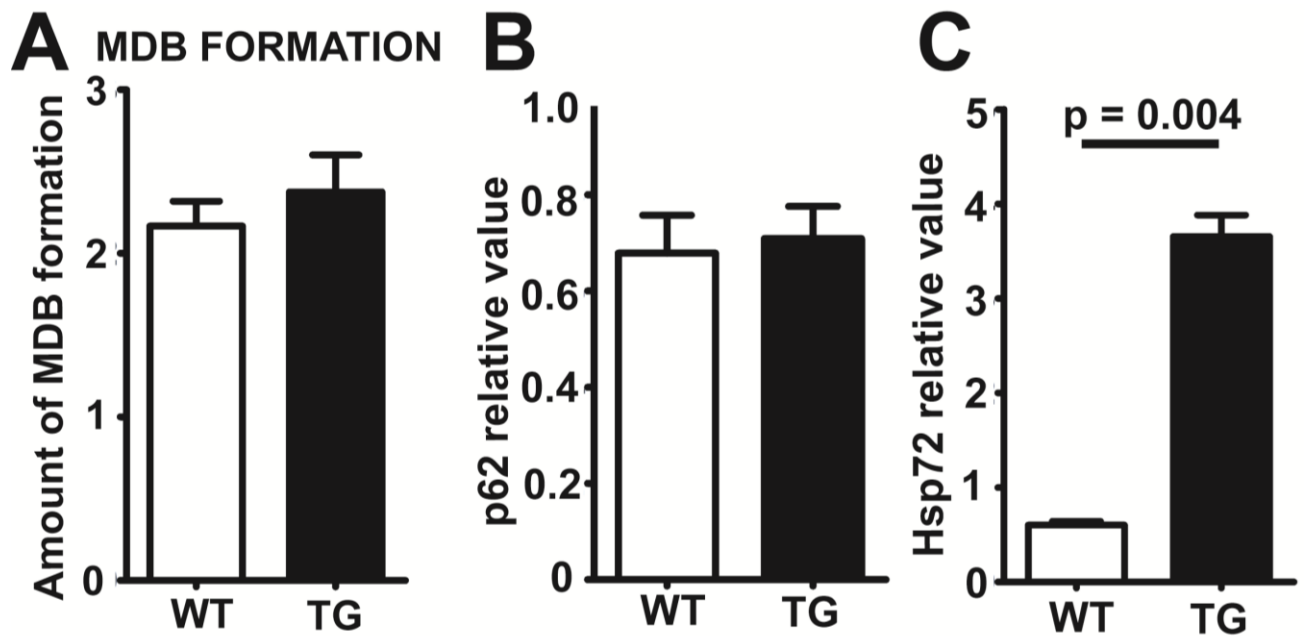

**Fig. S9. Quantification of alterations seen in animals exposed to DDC.** (A) The amount of Mallory-Denk bodies (MDB) was semi-quantitatively assessed in hepatic sections from DDC-exposed, non-transgenic (WT) and double transgenic (TG) mice stained with keratin 8/18 (K8/K18) and p62. (B, C) Immunoblotting against p62 and Hsp72 was carried out and the relative band intensity relative to  $\beta$ -tubulin that was used as a loading control was quantified by ImageJ. Results are expressed as mean  $\pm$  SEM, at least 8 mice per group were analyzed. Two-tailed Student's t-test was used for statistical evaluation.

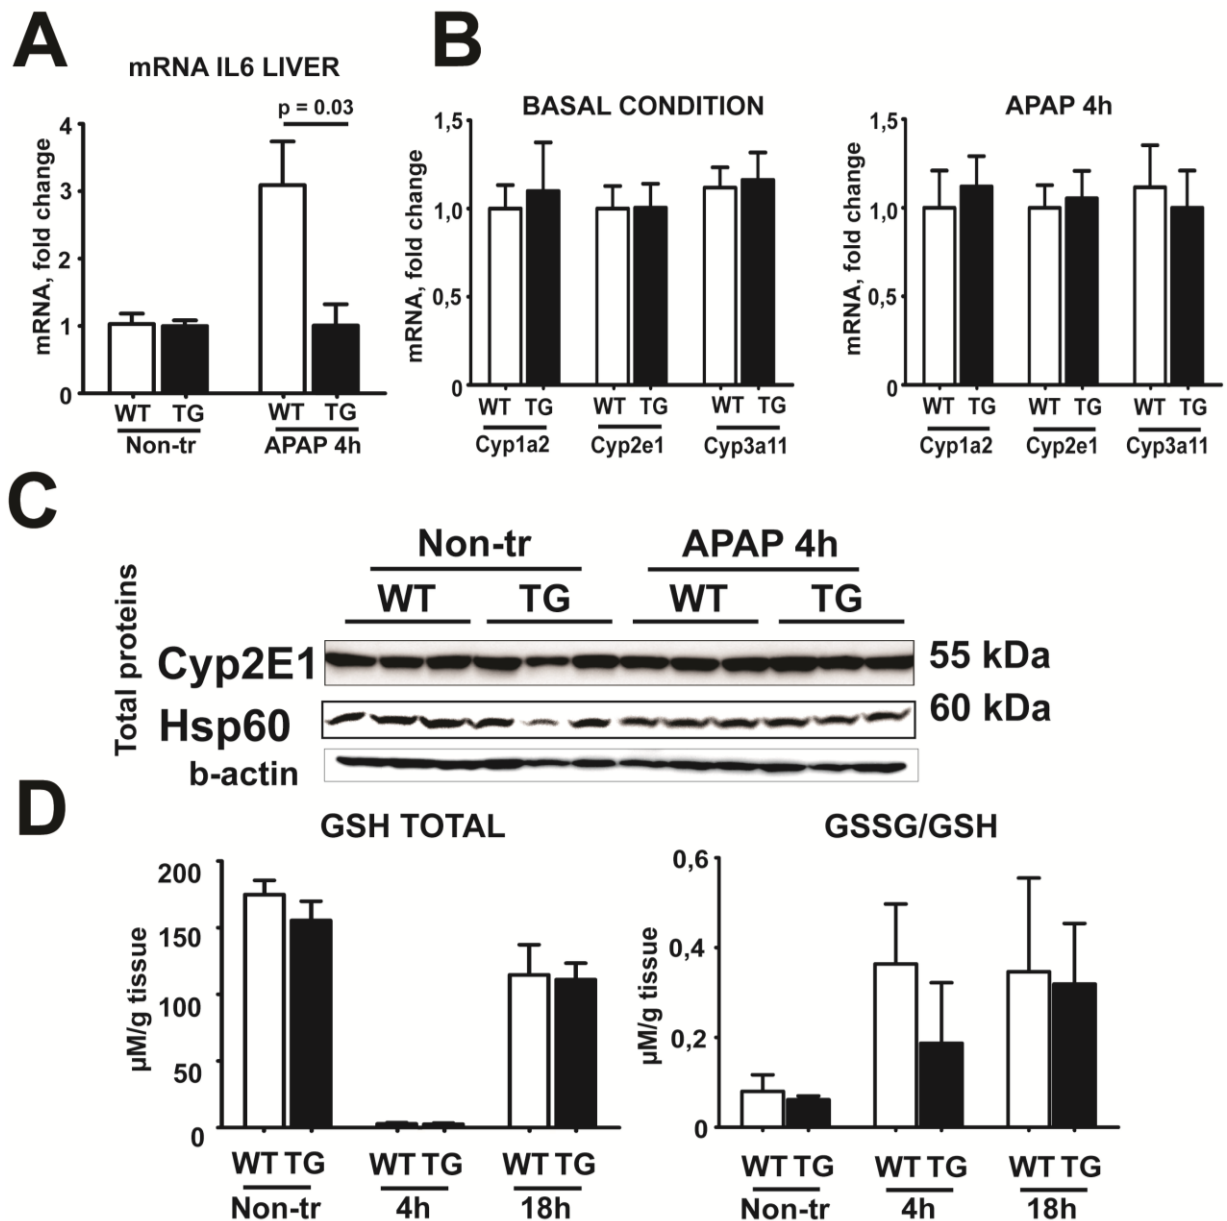

**Fig. S10. Hsp72 overexpression does not affect the major parameters of APAP metabolism.** The hepatic mRNA production of IL6 (A) as well as the APAP metabolism-related cytochrome genes Cyp1a2, Cyp2e1, Cyp3a11 (B) was assessed in non-transgenic (WT) and double transgenic (TG) animals under basal condition (Non-tr) and 4h after APAP administration (APAP 4h). The average mRNA expression in non-transgenic animals was arbitrarily set as 1 and the amounts in double transgenic mice represent a ratio (n=5). (C) Immunoblotting quantifies hepatic protein levels of Cyp2E1. Hsp60 and  $\beta$ -actin were used as loading controls. (D) The amount of total hepatic glutathione (GSH total) and the ratio of oxidized to reduced glutathione (GSSG/GSH) was measured. Results are expressed as mean  $\pm$  SEM (n = 5). Two-tailed Student's t-test was used for statistical evaluation. Cyp1a2, Cytochrome P450 1A2; Cyp2e1, Cytochrome P450 2E1; Cyp3a11, Cytochrome P450 3A11; IL6, Interleukin 6; Hsp60, Heat shock protein 60.

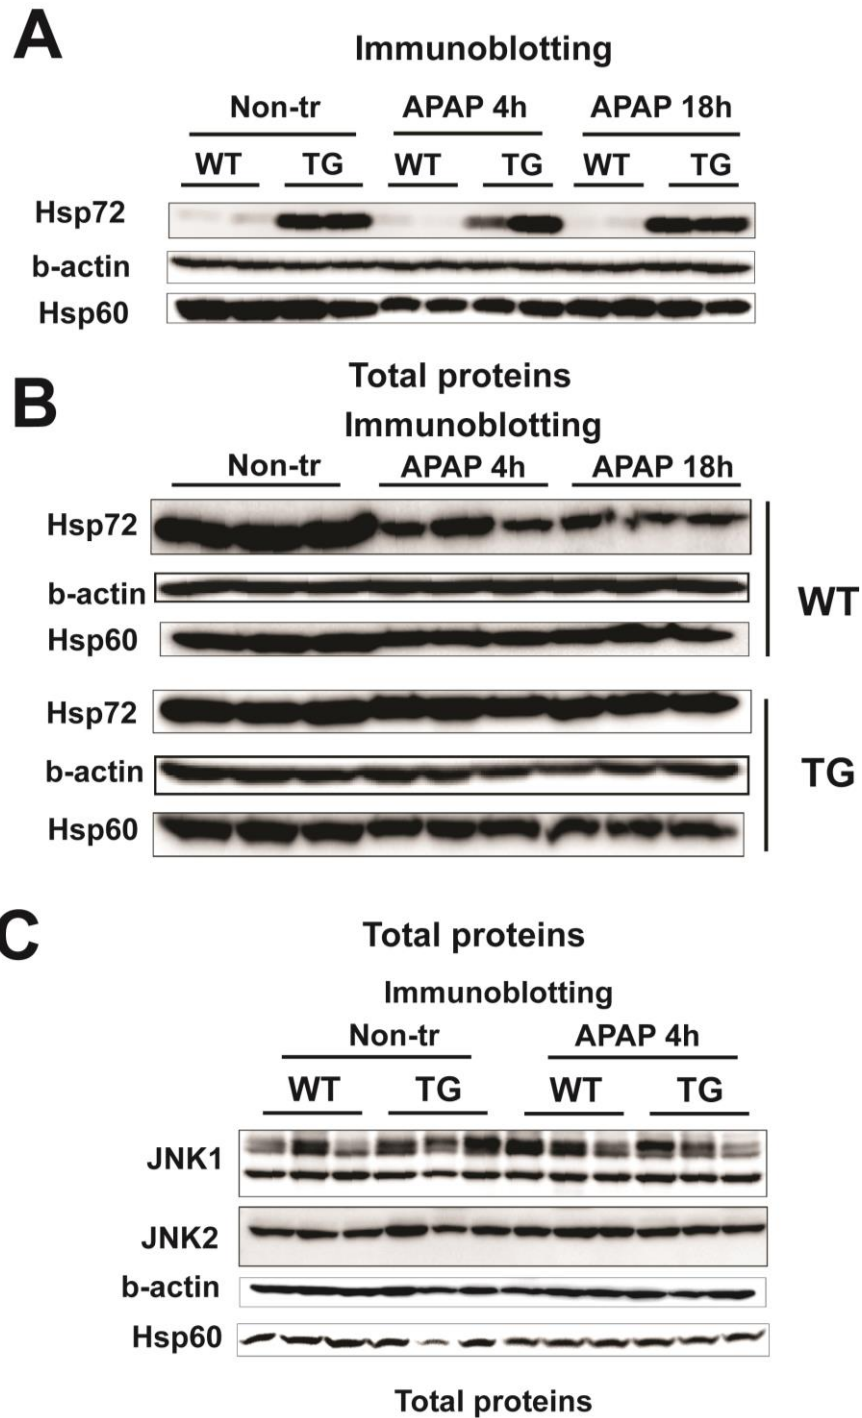

**Fig. S11. Hsp72 overexpression in double transgenic animals (TG) is retained after acetaminophen (APAP) treatment.** Immunoblotting depicts protein levels of Hsp72 (A, B) and JNK1/2 (C) in TG and non-transgenic (WT) mice prior (Non-tr) and 4h or 18h after APAP administration. Hsp60/ $\beta$ -actin were used as a loading controls. Hsp72, Heat shock protein 72; Hsp60, Heat shock protein 60; JNK1/2, C-Jun N-Terminal Kinases 1 and 2.

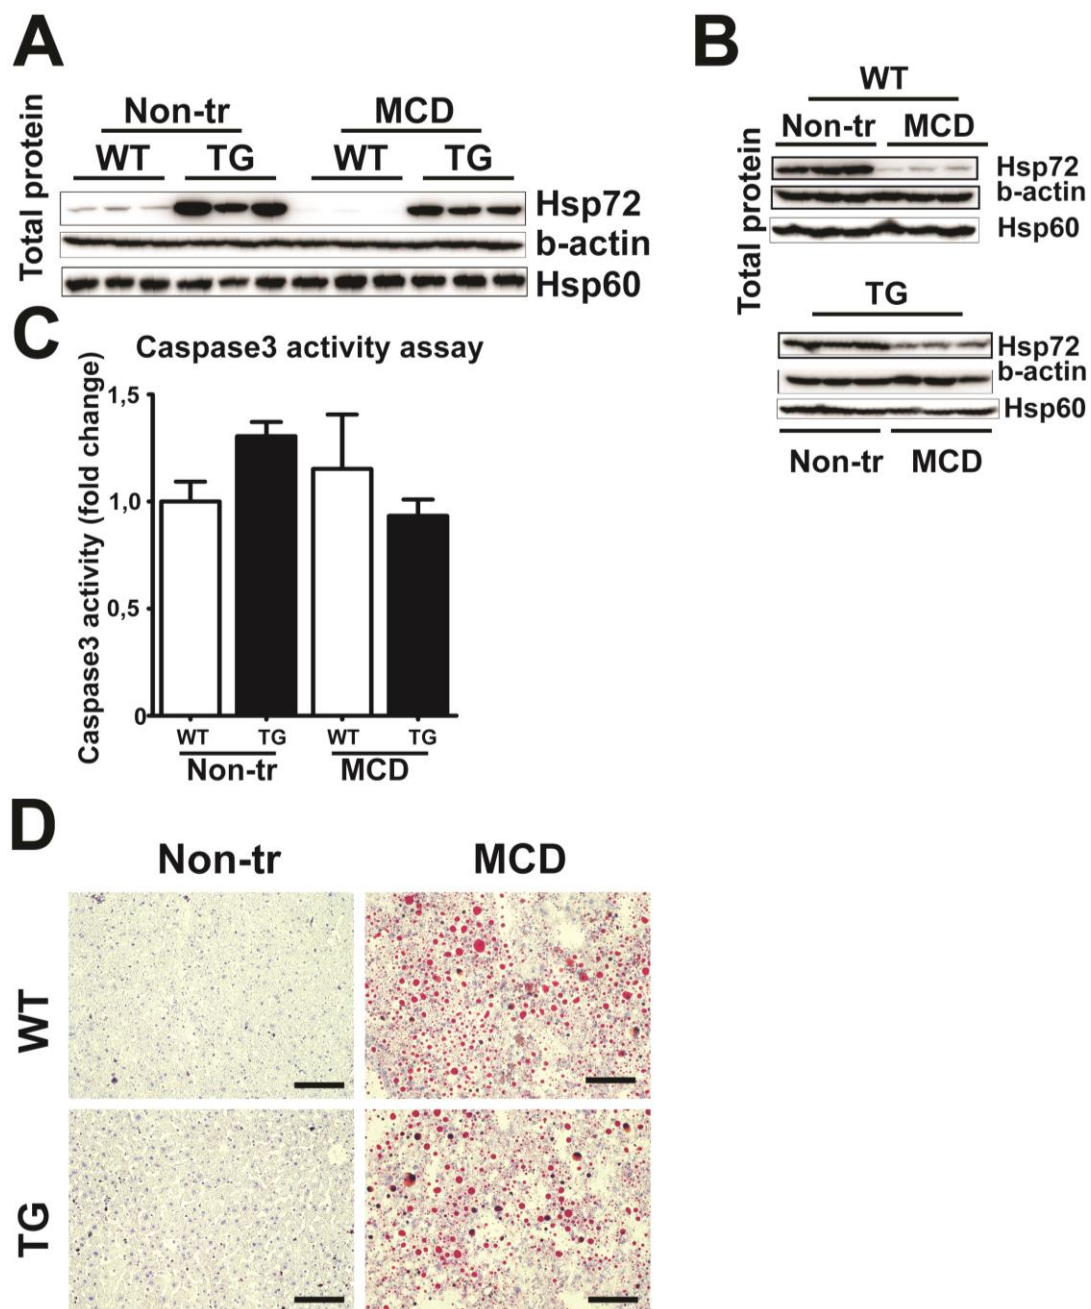

**Fig. S12. Hsp72 overexpression does not affect the development of liver steatosis induced by feeding with methionine choline-deficient diet (MCD).** (A,B) Immunoblotting quantifies protein levels of Hsp72 in double transgenic (TG) and non-transgenic (WT) mice prior (Non-tr) and after 8 weeks of treatment with MCD. Hsp60 and  $\beta$ -actin were used as loading controls. (C) Caspase 3 activity in liver lysates was determined and expressed as mean  $\pm$  SEM. The levels in non-treated, WT animals were arbitrarily set as 1 and all other levels represent a ratio. Two-tailed Student's t-test was used for statistical evaluation. (D) Oil-Red O staining was used to visualize lipid droplets in the depicted liver sections. Hsp72, Heat shock protein 72; Hsp60, Heat shock protein 60.

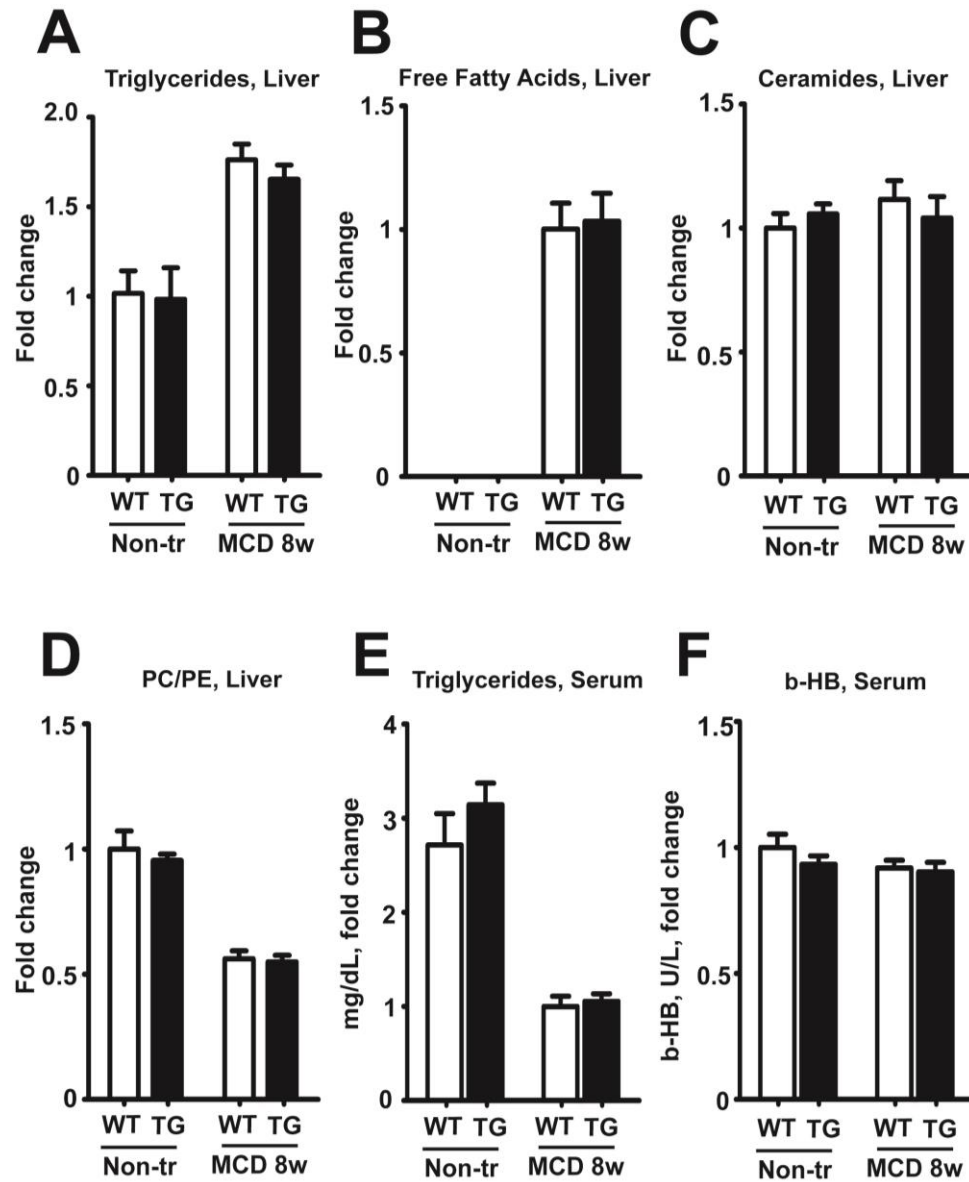

**Fig. S13. Hsp72 overexpression does not affect basic parameters of lipid metabolism.** The amount of triglycerides (A), free fatty acids (B), ceramides (C), phosphatidylcholine (PC) and phosphatidylethanolamine (PE) was quantified in the liver of non-transgenic (WT) and double transgenic mice (TG) kept on standard diet (Non-tr) or on MCD for 8 weeks (MCD 8w) via thin-layer chromatography (TLC). PC/PE (D) refers to a ratio between both phospholipids. Serum analysis of triglycerides (E) and beta-hydroxybutyric acid (b-HB) (F) was also performed. Data are expressed as mean  $\pm$  SEM, at least 5 mice per group were analyzed. Two-tailed Student's t-test was used for statistical evaluation.

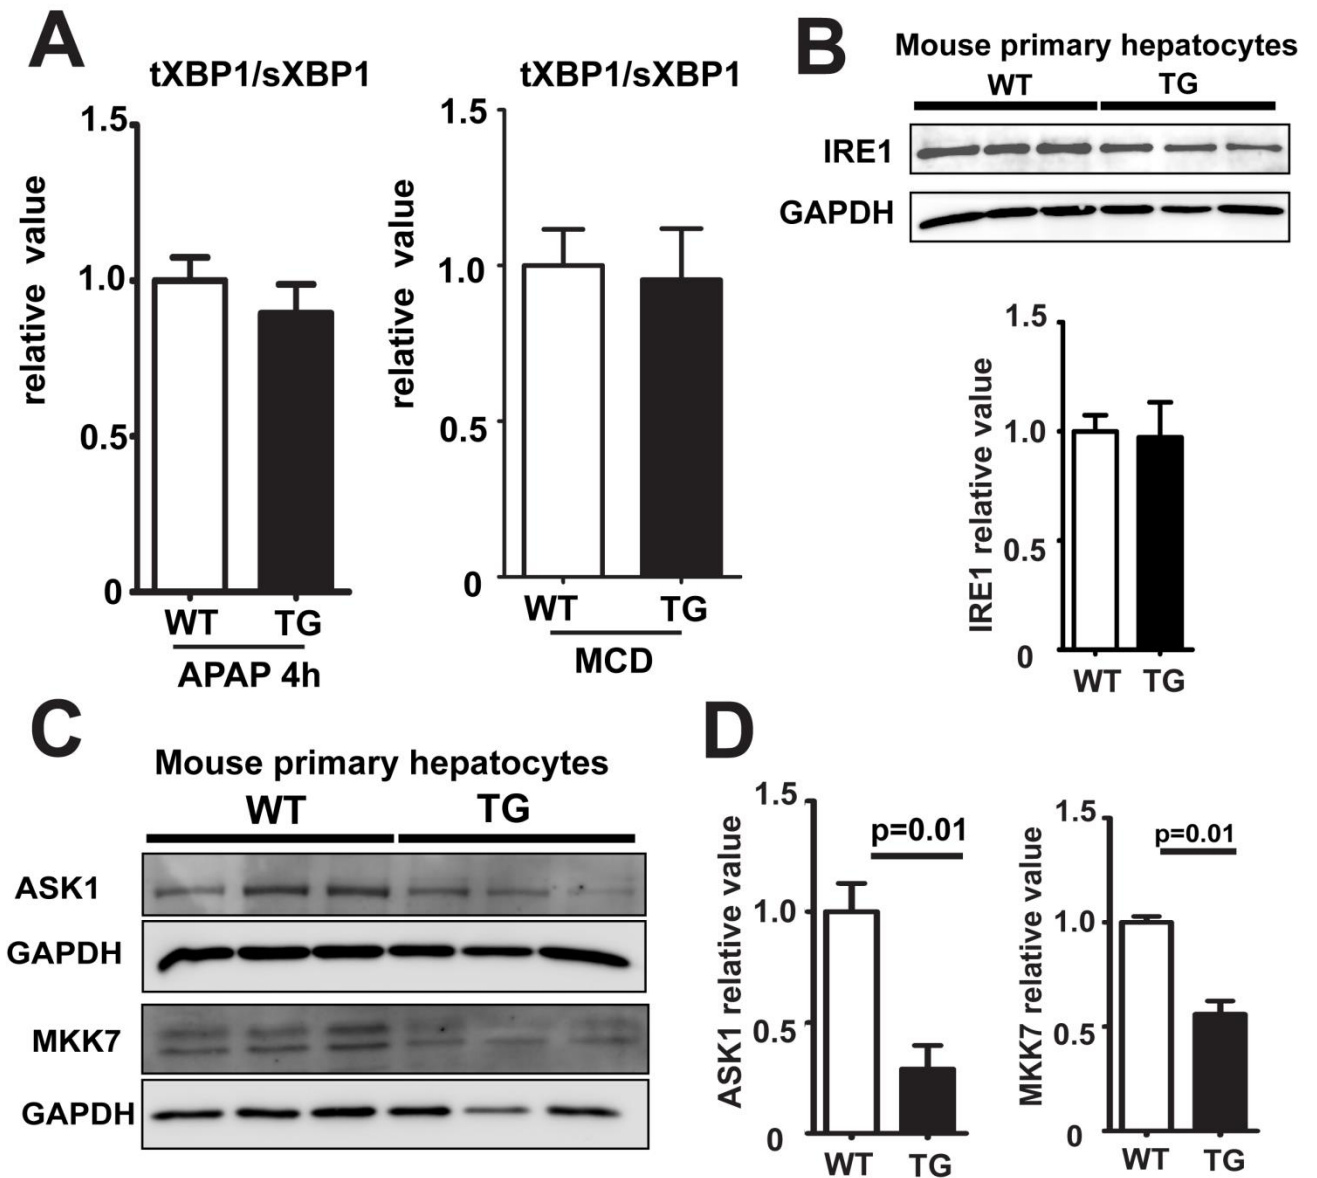

**Fig. S14. Primary mouse hepatocytes from Hsp72-overexpressing animals display decreased levels of stress-inducible kinases.** (A) The hepatic mRNA levels of X-box binding protein 1 (XBP1) were assessed in double transgenic (TG) and non-transgenic (WT) mice exposed to treatment with acetaminophen for 4 hours or MCD diet for 8 weeks. A ratio of total (t) versus spliced (s) isoform was analyzed. Data are expressed as mean  $\pm$  SEM, at least 8 mice per group were analyzed. The levels in WT mice were arbitrarily set as 1 and the levels in TG mice represent a ratio. (B-E) Primary hepatocytes were isolated from non-treated transgenic mice (TG) and immunoblotting was used to determine the amount of highlighted proteins in total hepatocyte lysates. The signal intensity was quantified by ImageJ and the results are expressed as mean  $\pm$  SEM, (n=6). GAPDH was used as loading control. Two-tailed Student's t-test was used for statistical evaluation.

## Supplementary Tables

**Table S1. Patient's characteristics.**

| <b>Etiology</b> | <b>Num.</b> | <b>% M</b> | <b>Age</b> | <b>Inflammation stage</b> | <b>Fibrosis stage</b> | <b>ALT, U/L</b> | <b>AST, U/L</b> |
|-----------------|-------------|------------|------------|---------------------------|-----------------------|-----------------|-----------------|
| <b>Control</b>  | 7           | 57%        | 44.6±4.5   | 0.0±0.0                   | 0.2±0,3               | NA              | NA              |
| <b>HCV</b>      | 34          | 65%        | 46.8±12,5  | 1.4±0.5                   | 1.7±1.0               | NA              | NA              |
| <b>NASH</b>     | 23          | 57%        | 49.1±12.1  | 1.5±0.2                   | 2.2±0.6               | 126±117         | 93±64           |

Results are expressed as mean ± SEM and list inflammation grades/fibrosis stages according to Kleiner scoring systems (NASH) and the METAVIR scoring system (HCV, controls). ALT, alanine aminotransferase; AST, aspartate aminotransferase; HCV - chronic hepatitis C infection, NA, not available, NASH - non-alcoholic steatohepatitis.



**Table S2. Genotyping and RT-PCR primers**

| Gene                                                                             | Species          | 5'- Sequence -3'                                             | Accession Nr.                  |
|----------------------------------------------------------------------------------|------------------|--------------------------------------------------------------|--------------------------------|
| <b>Genotyping primers</b>                                                        |                  |                                                              |                                |
| <b>HspA1A (HSP72)</b>                                                            | Human            | F: CTGTACCAGGGTGCCGGTGGT<br>R: GTCCCCAAACTCACCCCTGAAGTTCT    |                                |
| <b>Lap-tTA</b>                                                                   | Rat/<br>E.Coli   | F: GCTAGGTGTAGAGCAGCCTACATTG<br>R: GTCCAGATCGAAATCGTCTAGCGCG |                                |
| <b>Primers for qRT-PCR</b>                                                       |                  |                                                              |                                |
| <b>mCyp1a2</b><br><i>Cytochrome P450, family 1, subfamily a, polypeptide 2</i>   | Mouse            | F: TCTGCCAGTCTCCAGCCCCT<br>R: AGATGGCAGTGGCCAGTAGCA          | NM_009993.3                    |
| <b>mCyp2e1</b><br><i>Cytochrome P450, family 2, subfamily e, polypeptide 1</i>   | Mouse            | F: CTGGCCGAGGGGACATTCCTGT<br>R: AGGGAAAACCTCCGCACGTCCT       | NM_021282.2                    |
| <b>mCyp3a11</b><br><i>Cytochrome P450, family 3, subfamily a, polypeptide 11</i> | Mouse            | F: TGCTGTCACAGACCCAGAGACG<br>R: ACTCATTATCCCCACTGGGCCA       | NM_007818.3                    |
| <b>(m+h) HSP72</b><br><i>Heat shock protein family A (Hsp70) member 1A</i>       | Mouse +<br>human | F: ACGGGCGCGACCTGAACAAG<br>R: ATCAGGATGGCCGCTGCAC            | NM_005345.5<br>NM_010479.2     |
| <b>hHSP72</b><br><i>Heat shock protein family A (Hsp70) member 1A</i>            | Human            | F: GCCAACAAGATCACCATCAC<br>R: TTTGTACTTCTCCGCCTCCT           | NM_005345.5                    |
| <b>mIL6</b><br><i>Interleukin 6</i>                                              | Mouse            | F: ACAAAGCCAGAGTCCTTCAGAGAGA<br>R: TGGTCTTGGTCCCTTAGCCACTCC  | NM_031168.1                    |
| <b>mHamp1</b><br><i>Hepcidin</i>                                                 | Mouse            | F: CTGTCTCCTGCTTCTCCTCCT<br>R: GGCTGCAGCTCTGTAGTCTGT         | [S13]                          |
| <b>mSod2</b><br><i>Manganese superoxide dismutase 2</i>                          | Mouse            | F: GAACAATCTCAACGCCACCG<br>R: GCTGAAGAGCGACCTGAGTT           | NM_013671.3                    |
| <b>hRPLPO</b><br><i>Large Ribosomal Protein</i>                                  | Human            | F: GCAATGTTGCCAGTGTCTGT<br>R: GCCTTGACCTTTTCAGCAAG           | NM_001002.3                    |
| <b>mL7</b><br><i>Ribosomal protein L7</i>                                        | Mouse            | F: GAAAGGCAAGGAGGAAGCTCATCT<br>R: AATCTCAGTGCGGTACATCTGCCT   | AK017074.1                     |
| <b>Hsp27 (Hspb2)</b><br><i>Hspb2 heat shock protein 2</i>                        | Mouse            | F: TGTCTACCTCCCGTGGTGTAT<br>R: GGTTTATTCAGCCCCACCC           | NM_001164708.1                 |
| <b>GRP78-Hspa5 HSPA5</b><br><i>heat shock protein family A (Hsp70) member 5</i>  | Mouse            | F: GGTACCCACCAAGAAGTCTCAG<br>R: TCAGCAAACCTTCTCAGCATCAT      | NM_022310.3/<br>NM_001163434.1 |
| <b>Human Grp78</b><br><b>HSPA5 heat shock</b>                                    | Human            | F: GCTTATGGCCTGGATAAGAGG<br>R: CACGCTGGTCAAAGTCTTCTC         | <u>NM_005347.4</u>             |

**protein family A (Hsp70)  
member 5**

Hsp27 (Hspb2)

**Hspb2 heat shock  
protein 2**

Human

F: AGACGAGGTGACTGTGAGGA  
R: ACATAGGTGCGGCAGAACTC

NM\_001541.3

CD68

Human

F: AGCTACATGGCGGTGGAGTA  
R: CGAAGGGATGCATTCTGAGC

IL1b

***Interleukin 1beta***

Human

F: GCTCGCCAGTCAAATGATGG  
R: GGTGGTCGGAGATTCGTAGC

IL6

***Interleukin 6***

Human

F: TAGTGAGGAACAAGCCAGAGC  
R: TGGGTCAGGGGTGGTTATTG

**Table S3. Antibodies used for immunoblotting and immunohistochemistry**

| <b>Antibody</b>                                   | <b>Catalog number</b> | <b>Company</b>  |
|---------------------------------------------------|-----------------------|-----------------|
| <b>Cytochrome P4502E1</b>                         | 9140                  | Abcam           |
| <b>Hsc70</b>                                      | SPA-819               | Stressgen       |
| <b>Hsp27</b>                                      | sc-1049               | Santa Cruz      |
| <b>Hsp60</b>                                      | ADI-SPA-805           | Enzo            |
| <b>HSP72</b>                                      | ADI-SPA-812           | Enzo            |
| <b>Hsp90</b>                                      | 4877                  | Cell Signaling  |
| <b>JNK1</b>                                       | 3708 (2C6)            | Cell Signaling  |
| <b>JNK2</b>                                       | sc-827 (N-18)         | Santa Cruz      |
| <b>phospho-c-Jun</b>                              | 9164 (Ser73)          | Cell Signaling  |
| <b>phospho-SAPK/JNK</b>                           | 9251                  | Cell Signaling  |
| <b>phospho-SAPK/JNK</b>                           | 4668 (81E11)          | Cell Signalling |
| <b>Rip3</b>                                       | 2283                  | ProSci          |
| <b>β-actin</b>                                    | A1978                 | Sigma-Aldrich   |
| <b>Goat anti-mouse IgG (H+L), HRP conjugated</b>  | G21040                | Invitrogen      |
| <b>Goat anti-rabbit IgG (H+L), biotinylated</b>   | BA-1000               | Vector          |
| <b>Goat anti-rabbit IgG (H+L), HRP conjugated</b> | G21234                | Invitrogen      |
| <b>Goat anti-rat IgG (H+L), HRP conjugated</b>    | A10549                | Invitrogen      |
| <b>Rabbit anti-goat IgG (H+L)</b>                 | R21459                | Invitrogen      |
| <b>Grp78</b>                                      | 3177S                 | Cell Signaling  |

|                     |         |                |
|---------------------|---------|----------------|
| <b>Hsp27</b>        | sc-1049 | Santa Cruz     |
| <b>MKK7</b>         | 4172    | Cell Signaling |
| <b>IREalpha</b>     | 3294    | Cell Signaling |
| <b>ASK1 (D11C9)</b> | 8662    | Cell Signaling |

**Table S4. Fatty acids profile**

| Fatty acid                     |                             | Fold changes, TG/WT |        |
|--------------------------------|-----------------------------|---------------------|--------|
|                                |                             | Basal condition     | MCD 8w |
| <b>Myristoleic acid</b>        | 14:0                        | 1,18                | 0,58   |
| <b>Pentadecylic acid</b>       | 15:0                        | 1,00                |        |
| <b>Palmitic acid</b>           | 16:0                        | 1,19                | 1,10   |
| <b>Palmitoleic acid</b>        | 16:1w7cis                   | 1,23                | 0,73   |
|                                | 16:1w7trans                 | 1,05                | 0,48   |
| <b>Stearic acid</b>            | 18:0                        | 0,95                | 1,08   |
| <b>Oleic acid</b>              | 18:1w9cis                   | 1,16                | 0,91   |
| <b>Elaidic acid</b>            | 18:1w9trans                 | 0,10                | 0,65   |
| <b>Linoleic acid</b>           | 18:2w6,9 all cis            | 1,09                | 0,84   |
| <b>γ-Linolenic acid</b>        | 18:3w6,9,12 all cis         | 3,18                | 0,86   |
| <b>Arachidic acid</b>          | 20:0                        | 1,26                | 1,12   |
|                                | 20:1w7cis                   | 1,15                | 0,26   |
| <b>Eicosenoic acid</b>         | 20:1w9cis                   | 0,69                | 0,69   |
| <b>Eicosadienoic acid</b>      | 20:2w6,9 all cis            | 0,65                | 0,71   |
| <b>Dihomo-γ-linolenic acid</b> | 20:3w6,9,12 all cis         | 0,10                | 0,69   |
| <b>Arachidonic acid</b>        | 20:4w6,9,12,15 all cis      | 1,00                | 1,00   |
| <b>Behenic acid</b>            | 22:0                        | 0,01                | 1,45   |
| <b>Adrenic acid</b>            | 22:4w6,9,12,15 all cis      | 1,08                | 0,97   |
|                                | 22:5w3,6,9,12,15 all cis    | 1,94                | 0,68   |
| <b>Docosapentanoic acid w6</b> | 22:5w6,9,12,15,18 all cis   | 1,58                | 1,53   |
| <b>Docosahexanoic acid</b>     | 22:6w3,6,9,12,15,18 all cis | 1,13                | 0,98   |

|                                                                            |           |      |      |
|----------------------------------------------------------------------------|-----------|------|------|
| <b>Tricosylic acid</b>                                                     | 23:0      | 3,07 | 1,57 |
| <b>Lignoceric acid</b>                                                     | 24:0      | 2,20 | 1,11 |
|                                                                            | 24:1w9cis | 1,01 | 0,95 |
| <b>Cholesterol</b>                                                         |           | 1,01 | 1,04 |
| <b>Sum (<math>\mu\text{g}</math> fatty acids/mg<br/>tissue dry weight)</b> |           | 1,09 | 0,97 |
| <b>ratio sat/unsat</b>                                                     |           | 1,01 | 1,14 |
| <b>ratio C18/C16</b>                                                       |           | 0,87 | 0,86 |
| <b>sum &gt; C22</b>                                                        |           | 1,21 | 1,15 |

---

Two-tailed Student's t-test was used for statistical evaluation.

## References

- S1. Borkham-Kamphorst E, Drews F, Weiskirchen R. Induction of lipocalin-2 expression in acute and chronic experimental liver injury moderated by pro-inflammatory cytokines interleukin-1beta through nuclear factor-kappaB activation. *Liver international : official journal of the International Association for the Study of the Liver* 2011;31(5):656-65 doi: 10.1111/j.1478-3231.2011.02495.x[published Online First: Epub Date]].
- S2. Fuchs CD, Claudel T, Kumari P, et al. Absence of adipose triglyceride lipase protects from hepatic endoplasmic reticulum stress in mice. *Hepatology (Baltimore, Md)* 2012;56(1):270-80
- S3. Guldiken N, Kobazi Ensari G, Lahiri P, et al. Keratin 23 is a stress-inducible marker of mouse and human ductular reaction in liver disease. *Journal of hepatology* 2016;65(3):552-9 doi: 10.1016/j.jhep.2016.04.024[published Online First: Epub Date]].
- S4. Strnad P, Guldiken N, Helenius TO, et al. Simple Epithelial Keratins. *Methods in enzymology* 2016;568:351-88 doi: 10.1016/bs.mie.2015.08.004[published Online First: Epub Date]].
- S5. Lunova M, Goehring C, Kuscuoglu D, et al. Hepcidin knockout mice fed with iron-rich diet develop chronic liver injury and liver fibrosis due to lysosomal iron overload. *Journal of hepatology* 2014;61(3):633-41 doi: 10.1016/j.jhep.2014.04.034[published Online First: Epub Date]].
- S6. James LP, Alonso EM, Hynan LS, et al. Detection of acetaminophen protein adducts in children with acute liver failure of indeterminate cause. *Pediatrics* 2006;118(3):e676-81 doi: 10.1542/peds.2006-0069[published Online First: Epub Date]].
- S7. Muldrew KL, James LP, Coop L, et al. Determination of acetaminophen-protein adducts in mouse liver and serum and human serum after hepatotoxic doses of acetaminophen using high-performance liquid chromatography with electrochemical detection. *Drug Metabolism and Disposition* 2002;30(4):446-51
- S8. Simon Y, Kessler SM, Gemperlein K, et al. Elevated free cholesterol in a p62 overexpression model of non-alcoholic steatohepatitis. *World J Gastroenterol* 2014;20(47):17839-50
- S9. Kessler SM, Simon Y, Gemperlein K, et al. Fatty acid elongation in non-alcoholic steatohepatitis and hepatocellular carcinoma. *International journal of molecular sciences* 2014;15(4):5762-73
- S10. Kessler SM, Laggai S, Van Wonterg E, et al. Transient Hepatic Overexpression of Insulin-Like Growth Factor 2 Induces Free Cholesterol and Lipid Droplet Formation. *Frontiers in physiology* 2016;7:147 doi: 10.3389/fphys.2016.00147[published Online First: Epub Date]].

- S11. Dembek, A., Laggai, S., Kessler, S.M., Czepukojc, B., Simon, Y., Kiemer, A.K., and Hoppstädter, J. (2016). Hepatic interleukin-6 production is maintained during endotoxin tolerance and facilitates lipid accumulation. *Immunobiology* in press.
- S12. Guldiken N, Usachov V, Levada K, et al. Keratins 8 and 18 are type II acute-phase responsive genes overexpressed in human liver disease. *Liver international : official journal of the International Association for the Study of the Liver* 2015;**35**(4):1203-12 doi: 10.1111/liv.12608[published Online First: Epub Date]].
